# Supplementary material for: Proposal of the Indonesian Framework for Telecommunications Infrastructure Based on Network and Socioeconomic Indicators
Source: MDPI journal article supplement (doi:10.3390/informatics10020044), 2023-05-12
Supplement: s1 [file s1]

Archive with 42 entries (42 files):
- Figure S1.tif
- Figure S10.tif
- Figure S11.jpg
- Figure S12.tif
- Figure S13.tif
- Figure S2.tif
- Figure S3.jpg
- Figure S4 (FCF).jpg
- Figure S5 (RoI).jpg
- Figure S6 (NPM).jpg
- Figure S7.jpg
- Figure S7.PNG
- Figure S8.tif
- Figure S9.tif
- File S1 (Appendix A).pdf
- File S2 (Appendix B).pdf
- File S3 (Appendix C).pdf
- File S4 (Appendix D).pdf
- File S5 (Appendix E).pdf
- File S6 (Appendix F).pdf
- File S7 (Appendix G).pdf
- File S8 (Appendix H).pdf
- Table S1.tif
- Table S10 (Transaction).tif
- Table S11(Lodging).tif
- Table S12 (Health).tif
- Table S13 (Financial Activities).tif
- Table S14 (Industrial Capacity).tif
- Table S15 (Tourism).tif
- Table S16 (Mining).tif
- Table S17 (Residential Conditions).tif
- Table S18 (Road Access).tif
- Table S19 (Regional Finance).tif
- Table S2.tif
- Table S20 (Population).tif
- Table S3.tif
- Table S4 (ODP).tif
- Table S5 (SigCov).tif
- Table S6 (Traffic).tif
- Table S7 (Sites).tif
- Table S8 (Electricity).tif
- Table S9 (Education).tif
