# Supplementary material for: Proposal of the Indonesian Framework for Telecommunications Infrastructure Based on Network and Socioeconomic Indicators
Source: MDPI journal article supplement (doi:10.3390/informatics10020044), 2023-05-12
Supplement: s1 [file s1 › File S5 (Appendix E).pdf]

## S5: Appendix E - Telecommunication Networks Indicators Data Processing

### Indicator 1: Optical Distribution Points (ODPs)

Certainly, the blankspot area lacks telecommunications infrastructure, hence there is no ODP on grid #1. Presume that ODP exists in the other grids. The threshold points are 1 Gigabit per second and 2048 Gigabits per second. The following is an example of a computation using Microsoft Excel:  $K2=L2=IF(J2=0;1;IF(J2<1000;2;IF(J2\leq 2048;3;4)))$ . The calculation yields the result indicated in Table S4.

**Table S4.** Optical Distribution Points (ODPs) Data Processing Example

| L2                                         |     |        |          |       |               |         |                 |                                              |                              |           |          |
|--------------------------------------------|-----|--------|----------|-------|---------------|---------|-----------------|----------------------------------------------|------------------------------|-----------|----------|
| =IF(J2=0;1;IF(J2<1000;2;IF(J2<=2048;3;4))) |     |        |          |       |               |         |                 |                                              |                              |           |          |
|                                            | No. | IDProp | Province | IDKab | Regency       | IDKec   | District        | The presence of ODP [exists or is not / 1-0] | Transmission Capacity [Mbps] | ODP Index | ODP Grid |
| 1                                          | 1   | 11     | ACEH     | 1101  | SIMEULUE      | 1101010 | TEUPAH SELATAN  | 0                                            | 0                            | 1         | 1        |
| 2                                          | 2   | 11     | ACEH     | 1101  | SIMEULUE      | 1101020 | SIMEULUE TIMUR  | 0                                            | 0                            | 1         | 1        |
| 3                                          | 3   | 11     | ACEH     | 1101  | SIMEULUE      | 1101021 | TEUPAH BARAT    | 0                                            | 0                            | 1         | 1        |
| 4                                          | 4   | 11     | ACEH     | 1101  | SIMEULUE      | 1101022 | TEUPAH TENGAH   | 1                                            | 1038                         | 3         | 3        |
| 5                                          | 5   | 11     | ACEH     | 1101  | SIMEULUE      | 1101030 | SIMEULUE TENGAH | 0                                            | 0                            | 1         | 1        |
| 16                                         | 19  | 11     | ACEH     | 1102  | ACEH SINGKIL  | 1102033 | SURO            | 0                                            | 0                            | 1         | 1        |
| 17                                         | 23  | 11     | ACEH     | 1103  | ACEH SELATAN  | 1103011 | TRUMON TIMUR    | 1                                            | 100000                       | 4         | 4        |
| 39                                         | 45  | 11     | ACEH     | 1104  | ACEH TENGGARA | 1104022 | SEMADAM         | 1                                            | 226                          | 2         | 2        |
| 40                                         | 46  | 11     | ACEH     | 1104  | ACEH TENGGARA | 1104023 | LEUSER          | 0                                            | 0                            | 1         | 1        |

### Indicator 2: Coverage Prediction / Signal Coverage (SigCov)

According to the average postulate, the total data is totaled and divided by 3. So that each data's contribution is 33.3%. A zone formation threshold is derived from the average result, which is null because there is no signal = grid #1 and 100% divided by 3 for the remainder of the grid ( $0 \times 33.3 = \text{grid \#2}$ ;  $33.3 \times 66.7 = \text{grid \#3}$ ;  $>66.7 = \text{grid \#4}$ ). The following is an example of a computation using Microsoft Excel:  $R2=IF(Q2>66,7;4;IF(Q2>33,3;3;IF(Q2>0;2;1)))$ . The calculation yields the result indicated in Table S5.

**Table S5.** Coverage Prediction / Signal Coverage (SigCov) Data Processing Example

Example

|     |     |        |          |       |              |         |                    |  |                 |                 |                 |              |                                           |  |  |  |  |  |  |  |  |  |  |  |  |
|-----|-----|--------|----------|-------|--------------|---------|--------------------|--|-----------------|-----------------|-----------------|--------------|-------------------------------------------|--|--|--|--|--|--|--|--|--|--|--|--|
| R2  |     |        |          |       |              |         |                    |  |                 |                 |                 |              | =IF(Q2>66,7;4;IF(Q2>33,3;3;IF(Q2>0;2;1))) |  |  |  |  |  |  |  |  |  |  |  |  |
|     | A   | B      | C        | D     | E            | F       | G                  |  | N               | O               | P               | Q            | R                                         |  |  |  |  |  |  |  |  |  |  |  |  |
|     | No. | IDProp | Province | IDKab | Regency      | IDKec   | District           |  | 2G Coverage [%] | 3G Coverage [%] | 4G Coverage [%] | SIGCOV Index | SIGCOV Grid                               |  |  |  |  |  |  |  |  |  |  |  |  |
| 1   |     |        |          |       |              |         |                    |  |                 |                 |                 |              |                                           |  |  |  |  |  |  |  |  |  |  |  |  |
| 2   | 1   | 11     | ACEH     | 1101  | SIMEULUE     | 1101010 | TEUPAH SELATAN     |  | 100             | 9,93644         | 14,17146        | 41,3693003   |                                           |  |  |  |  |  |  |  |  |  |  |  |  |
| 3   | 2   | 11     | ACEH     | 1101  | SIMEULUE     | 1101020 | SIMEULUE TIMUR     |  | 100             | 0,269268        | 0,470867        | 33,5800448   |                                           |  |  |  |  |  |  |  |  |  |  |  |  |
| 4   | 3   | 11     | ACEH     | 1101  | SIMEULUE     | 1101021 | TEUPAH BARAT       |  | 100             | 0,086138        | 3,956425        | 34,68085436  |                                           |  |  |  |  |  |  |  |  |  |  |  |  |
| 5   | 4   | 11     | ACEH     | 1101  | SIMEULUE     | 1101022 | TEUPAH TENGAH      |  | 100             | 34,33431        | 100             | 78,11143726  |                                           |  |  |  |  |  |  |  |  |  |  |  |  |
| 13  | 12  | 11     | ACEH     | 1102  | ACEH SINGKIL | 1102011 | PULAU BANYAK BARAT |  | 65,2205         | 0,142442        | 8,639656        | 24,6675339   |                                           |  |  |  |  |  |  |  |  |  |  |  |  |
| 312 | 376 | 12     | SUMATER  | 1206  | TOBA SAMOSIR | 1206051 | BORBOR             |  | 0               | 0               | 0               | 0            |                                           |  |  |  |  |  |  |  |  |  |  |  |  |

Coverage data are obtained as primary data from the desktop analysis of the signal coverage of Indonesian cellular service providers (Telkomsel, XL Axiata, H3I, Indosat, Smartfren Telecom) collected in 2019 by the Directorate of Posts and Informatics Control - Directorate General of Posts and Informatics Operations - Ministry of Communications and Informatics. The 2G/3G/4G signal received may originate from inside or outside the district polygon. Data comprises of percentages for "2G coverage", "3G coverage", and "4G coverage".

That is not necessarily the districts with cellular transmitting antennas (2G BTS / NodeB 3G / eNodeB 4G), their residents are served by telecommunications signals due to geographical obstacles / clutter loss / path loss. It could be that the signal is on the roof of the house but does not penetrate the house. In contrast, despite the absence of cellular transmitting antennas, it is still feasible to obtain telecommunications services / signals due to the transmitter's elevated placement from the neighborhood's district. These two characteristics are termed signal coverage (SigCov). Therefore, the number of mobile cellular (2G/3G/4G) stations from cellular service providers and traffic data from end-user level (OOKLA crowdsourcing) provides cross-validation for coverage prediction.

### Indicator 3: Traffic

Traffic includes four pieces of information, including download speed, upload speed, latency, and jitter. In accordance with the mean postulate, the whole data is summed and divided by 4. So that 25% of each data is contributed. A zone formation threshold is derived from the average result, which is null because there is no signal = grid #1 and 100% divided by 3 for the remainder of the grid (0x33.3 = grid #2; 33.3x66.7 = grid #3; >66.7 = grid #4). The following is an example of a computation using Microsoft Excel: X2= AVERAGE (T2:W2) and Y2=IF(X2>66,7;4;IF(X2>33,3;3;IF(X2>0;2;1))). The calculation yields the result indicated in Table S6.

**Table S6. Traffic Data Processing Example**

|    |     |        |          |       |              |         |                |   |                                           |                                         |                                  |                                 |               |              |                                           |  |  |  |  |  |  |  |  |  |  |  |  |  |  |
|----|-----|--------|----------|-------|--------------|---------|----------------|---|-------------------------------------------|-----------------------------------------|----------------------------------|---------------------------------|---------------|--------------|-------------------------------------------|--|--|--|--|--|--|--|--|--|--|--|--|--|--|
| Y2 |     |        |          |       |              |         |                |   |                                           |                                         |                                  |                                 |               |              | =IF(X2>66,7;4;IF(X2>33,3;3;IF(X2>0;2;1))) |  |  |  |  |  |  |  |  |  |  |  |  |  |  |
|    | A   | B      | C        | D     | E            | F       | G              | H | T                                         | U                                       | V                                | W                               | X             | Y            |                                           |  |  |  |  |  |  |  |  |  |  |  |  |  |  |
|    | No. | IDProp | Province | IDKab | Regency      | IDKec   | District       |   | Download Speed Average in 3 months [Mbps] | Upload Speed Average in 3 months [Mbps] | Latency Average in 3 months [ms] | Jitter Average in 3 months [ms] | Traffic Index | Traffic Grid |                                           |  |  |  |  |  |  |  |  |  |  |  |  |  |  |
| 1  |     |        |          |       |              |         |                |   |                                           |                                         |                                  |                                 |               |              |                                           |  |  |  |  |  |  |  |  |  |  |  |  |  |  |
| 2  | 1   | 11     | ACEH     | 1101  | SIMEULUE     | 1101010 | TEUPAH SELATAN |   | 9,874169922                               | 3,173974609                             | 88,35                            | 173,035                         | 68,6082861    |              |                                           |  |  |  |  |  |  |  |  |  |  |  |  |  |  |
| 3  | 2   | 11     | ACEH     | 1101  | SIMEULUE     | 1101020 | SIMEULUE TIMUR |   | 25,52942122                               | 11,48582316                             | 38,29813665                      | 57,7173913                      | 33,2576931    |              |                                           |  |  |  |  |  |  |  |  |  |  |  |  |  |  |
| 8  | 7   | 11     | ACEH     | 1101  | SIMEULUE     | 1101032 | SIMEULUE CUT   |   | 22,33011768                               | 15,56839471                             | 183,5421335                      | 108,364239                      | 82,4512212    |              |                                           |  |  |  |  |  |  |  |  |  |  |  |  |  |  |
| 9  | 8   | 11     | ACEH     | 1101  | SIMEULUE     | 1101040 | SALANG         |   | 39,85443115                               | 16,67478434                             | 41                               | 96,31041667                     | 48,459908     |              |                                           |  |  |  |  |  |  |  |  |  |  |  |  |  |  |
| 10 | 9   | 11     | ACEH     | 1101  | SIMEULUE     | 1101050 | SIMEULUE BARAT |   | 7,219604492                               | 3,957885742                             | 31,9375                          | 88,1125                         | 32,8068726    |              |                                           |  |  |  |  |  |  |  |  |  |  |  |  |  |  |
| 11 | 10  | 11     | ACEH     | 1101  | SIMEULUE     | 1101051 | ALAFAN         |   | 0                                         | 0                                       | 0                                | 0                               | 0             | 1            |                                           |  |  |  |  |  |  |  |  |  |  |  |  |  |  |
| 12 | 11  | 11     | ACEH     | 1102  | ACEH SINGKIL | 1102010 | PULAU BANYAK   |   | 3,420898438                               | 2,693684896                             | 34,66666667                      | 86,7                            | 31,8703125    |              |                                           |  |  |  |  |  |  |  |  |  |  |  |  |  |  |

|     |     |        |          |       |              |         |                |   |                                          |                                          |                                          |            |           |                                 |  |  |  |  |  |  |  |  |  |  |  |  |  |
|-----|-----|--------|----------|-------|--------------|---------|----------------|---|------------------------------------------|------------------------------------------|------------------------------------------|------------|-----------|---------------------------------|--|--|--|--|--|--|--|--|--|--|--|--|--|
| AD2 |     |        |          |       |              |         |                |   |                                          |                                          |                                          |            |           | = (0,3*AA2)+(0,2*AB2)+(0,5*AC2) |  |  |  |  |  |  |  |  |  |  |  |  |  |
|     | A   | B      | C        | D     | E            | F       | G              | H | AA                                       | AB                                       | AC                                       | AD         | AE        |                                 |  |  |  |  |  |  |  |  |  |  |  |  |  |
|     | No. | IDProp | Province | IDKab | Regency      | IDKec   | District       |   | Number of 2G Sites [point <sup>1</sup> ] | Number of 3G Sites [point <sup>1</sup> ] | Number of 4G Sites [point <sup>1</sup> ] | Site Index | Site Grid |                                 |  |  |  |  |  |  |  |  |  |  |  |  |  |
| 1   |     |        |          |       |              |         |                |   |                                          |                                          |                                          |            |           |                                 |  |  |  |  |  |  |  |  |  |  |  |  |  |
| 2   | 1   | 11     | ACEH     | 1101  | SIMEULUE     | 1101010 | TEUPAH SELATAN |   | 8                                        | 0                                        | 9                                        | 6,9        | 2         |                                 |  |  |  |  |  |  |  |  |  |  |  |  |  |
| 3   | 2   | 11     | ACEH     | 1101  | SIMEULUE     | 1101020 | SIMEULUE TIMUR |   | 52                                       | 81                                       | 48                                       | 55,8       | 3         |                                 |  |  |  |  |  |  |  |  |  |  |  |  |  |
| 7   | 6   | 11     | ACEH     | 1101  | SIMEULUE     | 1101031 | TELUK DALAM    |   | 74                                       | 123                                      | 108                                      | 100,8      | 4         |                                 |  |  |  |  |  |  |  |  |  |  |  |  |  |
| 211 | 253 | 11     | ACEH     | 1117  | BENER MERIAH | 1117051 | BENER KELIPAH  |   | 0                                        | 0                                        | 0                                        | 0          | 1         |                                 |  |  |  |  |  |  |  |  |  |  |  |  |  |
| 212 | 254 | 11     | ACEH     | 1117  | BENER MERIAH | 1117060 | SYIAH UTAMA    |   | 6                                        | 0                                        | 3                                        | 3,3        | 2         |                                 |  |  |  |  |  |  |  |  |  |  |  |  |  |
| 213 | 255 | 11     | ACEH     | 1117  | BENER MERIAH | 1117061 | MESIDAH        |   | 0                                        | 0                                        | 0                                        | 0          | 1         |                                 |  |  |  |  |  |  |  |  |  |  |  |  |  |
| 214 | 256 | 11     | ACEH     | 1117  | BENER MERIAH | 1117070 | PERMATA        |   | 21                                       | 6                                        | 21                                       | 18         |           |                                 |  |  |  |  |  |  |  |  |  |  |  |  |  |
