# Supplementary material for: Proposal of the Indonesian Framework for Telecommunications Infrastructure Based on Network and Socioeconomic Indicators
Source: MDPI journal article supplement (doi:10.3390/informatics10020044), 2023-05-12
Supplement: s1 [file s1 › File S6 (Appendix F).pdf]

## S6: Appendix F - Socioeconomic Indicators Data Processing

Nevertheless, the data are generated according to the Postulate, with threshold determination based on Table 9 manuscript for each indicator. In addition, we provide postulates and examples of data processing in Microsoft Excel for thirteen socioeconomic variables (indicator number 5 until 17), as indicated in Tables S8 through S20. Moreover, we ask for suggestions to any correct information about how it should be if it is inappropriate.

**Table S8. Indicator 5: Electricity Data Processing Example**

| AI2      =SUM(AG2:AH2) |      |        |          |       |                    |         |                |                                           |                                         |                   |                  |
|------------------------|------|--------|----------|-------|--------------------|---------|----------------|-------------------------------------------|-----------------------------------------|-------------------|------------------|
|                        | No.  | IDProp | Province | IDKab | Regency            | IDKec   | District       | State Electricity Company (PLN) Users [%] | Non State Electricity Company Users [%] | Electricity Index | Electricity Grid |
| 1                      |      |        |          |       |                    |         |                |                                           |                                         |                   |                  |
| 2                      | 1    | 11     | ACEH     | 1101  | SIMEULUE           | 1101010 | TEUPAH SELATAN | 96,34509137                               | 0,3399915                               | 96,685083         | 4                |
| 6193                   | 6972 | 94     | PAPUA    | 9417  | PEGUNUNGAN BINTANG | 9417025 | OKSOP          | 0                                         | 4,506437768                             | 4,5064378         | 1                |
| 6197                   | 6976 | 94     | PAPUA    | 9417  | PEGUNUNGAN BINTANG | 9417031 | BIME           | 0                                         | 0                                       | 0                 | 1                |
| 6244                   | 7023 | 94     | PAPUA    | 9418  | TOLIKARA           | 9418048 | WARI / TAIYEVE | 0                                         | 94,45652174                             | 94,456522         | 3                |
| 6246                   | 7025 | 94     | PAPUA    | 9418  | TOLIKARA           | 9418051 | NUNGGAWI       | 0                                         | 79,59866221                             | 79,598662         | 2                |

**Table S9. Indicator 6: Education Data Processing Example**

| AR5850      =IF(AN5850=1;2;1) |             |       |            |         |                    |                    |                                                             |                                                      |                                                  |                 |                |
|-------------------------------|-------------|-------|------------|---------|--------------------|--------------------|-------------------------------------------------------------|------------------------------------------------------|--------------------------------------------------|-----------------|----------------|
|                               | Province    | IDKab | Regency    | IDKec   | District           | Primary School [%] | The presence of Junior High School [exists or is not / 1-0] | The presence of High School [exists or is not / 1-0] | The presence of College [exists or is not / 1-0] | Education Index | Education Grid |
| 1                             |             |       |            |         |                    |                    |                                                             |                                                      |                                                  |                 |                |
| 2                             | ACEH        | 1101  | SIMEULUE   | 1101010 | TEUPAH SELATAN     | 78,9474            | 1                                                           | 1                                                    | 0                                                |                 | 3              |
| 4                             | ACEH        | 1101  | SIMEULUE   | 1101021 | TEUPAH BARAT       | 77,7778            | 1                                                           | 0                                                    | 0                                                |                 | 2              |
| 228                           | ACEH        | 1171  | BANDA ACEH | 1171040 | SYIAH KUALA        | 80                 | 1                                                           | 0                                                    | 1                                                |                 | 4              |
| 5850                          | PAPUA BARAT | 9110  | MAYBRAT    | 9110110 | AIFAT TIMUR        | 27,2727            | 0                                                           | 0                                                    | 0                                                |                 | 1              |
| 5851                          | PAPUA BARAT | 9110  | MAYBRAT    | 9110111 | AIFAT TIMUR TENGAH | 30                 | 1                                                           | 0                                                    | 0                                                |                 | 2              |

**Table S10. Indicator 7: Buying and Selling Transactions Data Processing Example**

|     |     |        |          |       |            |         |                 |                                               |                                                 |                                |                               |                                         |                                       |                                      |                                               |  |  |  |  |  |  |  |  |  |  |  |  |  |  |
|-----|-----|--------|----------|-------|------------|---------|-----------------|-----------------------------------------------|-------------------------------------------------|--------------------------------|-------------------------------|-----------------------------------------|---------------------------------------|--------------------------------------|-----------------------------------------------|--|--|--|--|--|--|--|--|--|--|--|--|--|--|
| AZ2 |     |        |          |       |            |         |                 |                                               |                                                 |                                |                               |                                         |                                       |                                      | =IF(AY2>0,36;4;IF(AY2>0;3;IF(AY2>-0,44;2;1))) |  |  |  |  |  |  |  |  |  |  |  |  |  |  |
|     | A   | B      | C        | D     | E          | F       | G               | H                                             | AT                                              | AU                             | AV                            | AW                                      | AX                                    | AY                                   | AZ                                            |  |  |  |  |  |  |  |  |  |  |  |  |  |  |
|     | No. | IDProp | Province | IDKab | Regency    | IDKec   | District        | The presence of Mall [exists or is not / 1-0] | The presence of Market [exists or is not / 1-0] | Number of Shops/Stalls [point] | Number of Minimarkets [point] | Number of Food Stalls or Warteg [point] | Buying and Selling Transactions Index | Buying and Selling Transactions Grid |                                               |  |  |  |  |  |  |  |  |  |  |  |  |  |  |
| 1   |     |        |          |       |            |         |                 |                                               |                                                 |                                |                               |                                         |                                       |                                      |                                               |  |  |  |  |  |  |  |  |  |  |  |  |  |  |
| 2   | 1   | 11     | ACEH     | 1101  | SIMEULUE   | 1101010 | TEUPAH SELATAN  | 0                                             | 0                                               | 128                            | 0                             | 12                                      | -126.210                              |                                      |                                               |  |  |  |  |  |  |  |  |  |  |  |  |  |  |
| 3   | 2   | 11     | ACEH     | 1101  | SIMEULUE   | 1101020 | SIMEULUE TIMUR  | 1                                             | 1                                               | 309                            | 7                             | 53                                      | -26573                                |                                      |                                               |  |  |  |  |  |  |  |  |  |  |  |  |  |  |
| 6   | 5   | 11     | ACEH     | 1101  | SIMEULUE   | 1101030 | SIMEULUE TENGAH | 1                                             | 1                                               | 100                            | 1                             | 8                                       | -.02573                               |                                      |                                               |  |  |  |  |  |  |  |  |  |  |  |  |  |  |
| 161 | 186 | 11     | ACEH     | 1111  | ACEH UTARA | 1111101 | BAKTIYA BARAT   | 1                                             | 1                                               | 289                            | 0                             | 62                                      | .82445                                |                                      |                                               |  |  |  |  |  |  |  |  |  |  |  |  |  |  |
| 162 | 187 | 11     | ACEH     | 1111  | ACEH UTARA | 1111110 | LHOKSUKON       | 1                                             | 1                                               | 487                            | 8                             | 132                                     | -114.275                              |                                      |                                               |  |  |  |  |  |  |  |  |  |  |  |  |  |  |

**Table S11.** Indicator 8: Lodging Data Processing Example

|     |     |        |          |       |              |         |                |   |                                  |                                          |  |  |  |  |  |  |  |  |  |
|-----|-----|--------|----------|-------|--------------|---------|----------------|---|----------------------------------|------------------------------------------|--|--|--|--|--|--|--|--|--|
| BC2 |     |        |          |       |              |         |                |   |                                  | =IF(BB2<1;1;IF(BB2<10;2;IF(BB2<50;3;4))) |  |  |  |  |  |  |  |  |  |
|     | A   | B      | C        | D     | E            | F       | G              | H | BB                               | BC                                       |  |  |  |  |  |  |  |  |  |
|     | No. | IDProp | Province | IDKab | Regency      | IDKec   | District       |   | Number of<br>Hotels/Inns [point] | Lodging<br>Grid                          |  |  |  |  |  |  |  |  |  |
| 1   |     |        |          |       |              |         |                |   |                                  |                                          |  |  |  |  |  |  |  |  |  |
| 2   | 1   | 11     | ACEH     | 1101  | SIMEULUE     | 1101010 | TEUPAH SELATAN |   | 0                                | 1                                        |  |  |  |  |  |  |  |  |  |
| 3   | 2   | 11     | ACEH     | 1101  | SIMEULUE     | 1101020 | SIMEULUE TIMUR |   | 9                                | 2                                        |  |  |  |  |  |  |  |  |  |
| 12  | 11  | 11     | ACEH     | 1102  | ACEH SINGKIL | 1102010 | PULAU BANYAK   |   | 13                               | 3                                        |  |  |  |  |  |  |  |  |  |
| 231 | 275 | 11     | ACEH     | 1172  | SABANG       | 1172020 | SUKAKARYA      |   | 101                              | 4                                        |  |  |  |  |  |  |  |  |  |
| 232 | 276 | 11     | ACEH     | 1173  | LANGSA       | 1173010 | LANGSA TIMUR   |   | 0                                | 1                                        |  |  |  |  |  |  |  |  |  |

**Table S12.** Indicator 9: Health Facilities Data Processing Example

|      |      |        |          |       |             |         |                |   |                             |                                              |                           |                         |                        |                                         |  |  |  |  |  |  |  |  |  |  |  |  |  |
|------|------|--------|----------|-------|-------------|---------|----------------|---|-----------------------------|----------------------------------------------|---------------------------|-------------------------|------------------------|-----------------------------------------|--|--|--|--|--|--|--|--|--|--|--|--|--|
| B13  |      |        |          |       |             |         |                |   |                             |                                              |                           |                         |                        | =IF(BE3>1;4;IF(BE3=1;3;IF(BG3>=1;2;1))) |  |  |  |  |  |  |  |  |  |  |  |  |  |
|      | A    | B      | C        | D     | E           | F       | G              | H | BE                          | BF                                           | BG                        | BH                      | BI                     |                                         |  |  |  |  |  |  |  |  |  |  |  |  |  |
|      | No.  | IDProp | Province | IDKab | Regency     | IDKec   | District       |   | Number of Hospitals [point] | Number of Health Centers / Puskesmas [point] | Number of Clinics [point] | Health Facilities Index | Health Facilities Grid |                                         |  |  |  |  |  |  |  |  |  |  |  |  |  |
| 1    |      |        |          |       |             |         |                |   |                             |                                              |                           |                         |                        |                                         |  |  |  |  |  |  |  |  |  |  |  |  |  |
| 2    | 1    | 11     | ACEH     | 1101  | SIMEULUE    | 1101010 | TEUPAH SELATAN |   | 0                           | 19                                           | 2                         |                         | 2                      |                                         |  |  |  |  |  |  |  |  |  |  |  |  |  |
| 3    | 2    | 11     | ACEH     | 1101  | SIMEULUE    | 1101020 | SIMEULUE TIMUR |   | 1                           | 16                                           | 21                        |                         | 3                      |                                         |  |  |  |  |  |  |  |  |  |  |  |  |  |
| 222  | 266  | 11     | ACEH     | 1171  | BANDA ACEH  | 1171011 | JAYA BARU      |   | 2                           | 7                                            | 15                        |                         | 4                      |                                         |  |  |  |  |  |  |  |  |  |  |  |  |  |
| 6010 | 6789 | 94     | PAPUA    | 9410  | PANIAI      | 9410033 | PUGO DAGI      |   | 0                           | 0                                            | 0                         |                         | 1                      |                                         |  |  |  |  |  |  |  |  |  |  |  |  |  |
| 6036 | 6815 | 94     | PAPUA    | 9411  | PUNCAK JAYA | 9411054 | ILAMBURAWI     |   | 0                           | 0                                            | 0                         |                         | 1                      |                                         |  |  |  |  |  |  |  |  |  |  |  |  |  |

**Table S13.** Indicator 10: Financial Activities Data Processing Example

| BP2 |     |        |          |       |          |         |                 |   |                                                       |                               |                                  |                              |
|-----|-----|--------|----------|-------|----------|---------|-----------------|---|-------------------------------------------------------|-------------------------------|----------------------------------|------------------------------|
|     | A   | B      | C        | D     | E        | F       | G               | H | BM                                                    | BN                            | BO                               | BP                           |
|     | No. | IDProp | Province | IDKab | Regency  | IDKec   | District        |   | Koperasi<br>Unit Desa<br>(KUD) as<br>microbank<br>[%] | Number<br>of Banks<br>[point] | Financial<br>Activities<br>Index | Financial<br>Activities Grid |
| 1   |     |        |          |       |          |         |                 |   |                                                       |                               |                                  |                              |
| 2   | 1   | 11     | ACEH     | 1101  | SIMEULUE | 1101010 | TEUPAH SELATAN  |   | 57,894737                                             | 0                             |                                  | 2                            |
| 3   | 2   | 11     | ACEH     | 1101  | SIMEULUE | 1101020 | SIMEULUE TIMUR  |   | 47,058824                                             | 3                             |                                  | 4                            |
| 4   | 3   | 11     | ACEH     | 1101  | SIMEULUE | 1101021 | TEUPAH BARAT    |   | 11,111111                                             | 0                             |                                  | 2                            |
| 5   | 4   | 11     | ACEH     | 1101  | SIMEULUE | 1101022 | TEUPAH TENGAH   |   | 0                                                     | 0                             |                                  | 1                            |
| 6   | 5   | 11     | ACEH     | 1101  | SIMEULUE | 1101030 | SIMEULUE TENGAH |   | 6,25                                                  | 1                             |                                  | 3                            |

**Table S14.** Indicator 11: Industrial Capacity Data Processing Example

|     |     |        |          |       |              |  |         |                |   |                                          |                                            |                                          |                                 |                                        |  |  |  |  |  |  |  |  |  |  |  |  |  |
|-----|-----|--------|----------|-------|--------------|--|---------|----------------|---|------------------------------------------|--------------------------------------------|------------------------------------------|---------------------------------|----------------------------------------|--|--|--|--|--|--|--|--|--|--|--|--|--|
| BW2 |     |        |          |       |              |  |         |                |   |                                          |                                            |                                          |                                 | =IF(BU2>0;4;IF(BT2>0;3;IF(BS2>0;2;1))) |  |  |  |  |  |  |  |  |  |  |  |  |  |
|     | A   | B      | C        | D     | E            |  | F       | G              | H | BS                                       | BT                                         | BU                                       | BV                              | BW                                     |  |  |  |  |  |  |  |  |  |  |  |  |  |
|     | No. | IDProp | Province | IDKab | Regency      |  | IDKec   | District       |   | <20<br>industry<br>employees<br>[point'] | 20-99<br>industry<br>employees<br>[point'] | >99<br>industry<br>employees<br>[point'] | Industrial<br>Capacity<br>Index | Industrial<br>Capacity<br>Grid         |  |  |  |  |  |  |  |  |  |  |  |  |  |
| 1   |     |        |          |       |              |  |         |                |   |                                          |                                            |                                          |                                 |                                        |  |  |  |  |  |  |  |  |  |  |  |  |  |
| 2   | 1   | 11     | ACEH     | 1101  | SIMEULUE     |  | 1101010 | TEUPAH SELATAN |   | 5                                        | 1                                          | 0                                        |                                 | 3                                      |  |  |  |  |  |  |  |  |  |  |  |  |  |
| 3   | 2   | 11     | ACEH     | 1101  | SIMEULUE     |  | 1101020 | SIMEULUE TIMUR |   | 27                                       | 0                                          | 0                                        |                                 | 2                                      |  |  |  |  |  |  |  |  |  |  |  |  |  |
| 4   | 3   | 11     | ACEH     | 1101  | SIMEULUE     |  | 1101021 | TEUPAH BARAT   |   | 6                                        | 0                                          | 0                                        |                                 | 2                                      |  |  |  |  |  |  |  |  |  |  |  |  |  |
| 14  | 13  | 11     | ACEH     | 1102  | ACEH SINGKIL |  | 1102020 | SINGKIL        |   | 59                                       | 1                                          | 1                                        |                                 | 4                                      |  |  |  |  |  |  |  |  |  |  |  |  |  |
| 15  | 15  | 11     | ACEH     | 1102  | ACEH SINGKIL |  | 1102022 | KUALA BARU     |   | 0                                        | 0                                          | 0                                        |                                 |                                        |  |  |  |  |  |  |  |  |  |  |  |  |  |

Table S15. Indicator 12: Tourism Data Processing Example

| PROJ 010: Indicator 121 Tourism Data Processing Example |        |          |       |         |              |          |                           |                               |                              |                                  |                                |                             |                                             |                                 |                                     |                               |                  |                 |    |
|---------------------------------------------------------|--------|----------|-------|---------|--------------|----------|---------------------------|-------------------------------|------------------------------|----------------------------------|--------------------------------|-----------------------------|---------------------------------------------|---------------------------------|-------------------------------------|-------------------------------|------------------|-----------------|----|
| CJ2 = IF(CI2<1;1;IF(CI2<3;2;IF(CI2<6;3;4)))             |        |          |       |         |              |          |                           |                               |                              |                                  |                                |                             |                                             |                                 |                                     |                               |                  |                 |    |
| A                                                       | B      | C        | D     | E       | F            | G        | H                         | BY                            | BZ                           | CA                               | CB                             | CC                          | CD                                          | CE                              | CF                                  | CG                            | CH               | CI              | CJ |
| No.                                                     | IDProp | Province | IDKab | Regency | IDKec        | District | Other<br>Tours<br>[point] | Tourist<br>Village<br>[point] | Nature<br>Tourism<br>[point] | Artificial<br>Tourism<br>[point] | Cultural<br>Tourism<br>[point] | Monument<br>Tour<br>[point] | Beach and<br>Artificial<br>Tours<br>[point] | Religious<br>Tourism<br>[point] | Historical<br>Excursions<br>[point] | Pilgrimage<br>Tour<br>[point] | Tourism<br>Index | Tourism<br>Grid |    |
| 1                                                       | 1      | 11       | ACEH  | 1101    | SIMEULUE     | 1101010  | TEUPAH SELATAN            | 0                             | 0                            | 0                                | 0                              | 0                           | 0                                           | 2                               | 0                                   | 0                             | 0                | 2               |    |
| 3                                                       | 2      | 11       | ACEH  | 1101    | SIMEULUE     | 1101020  | SIMEULUE TIMUR            | 1                             | 0                            | 1                                | 0                              | 0                           | 0                                           | 2                               | 0                                   | 0                             | 0                | 4               |    |
| 4                                                       | 3      | 11       | ACEH  | 1101    | SIMEULUE     | 1101021  | TEUPAH BARAT              | 0                             | 0                            | 0                                | 0                              | 0                           | 0                                           | 0                               | 0                                   | 0                             | 0                | 0               |    |
| 12                                                      | 11     | 11       | ACEH  | 1102    | ACEH SINGKIL | 1102010  | PULAU BANYAK              | 3                             | 0                            | 3                                | 0                              | 0                           | 0                                           | 0                               | 0                                   | 0                             | 0                | 6               |    |
| 27                                                      | 33     | 11       | ACEH  | 1103    | ACEH SELATAN | 1103050  | TAPAK TUAN                | 6                             | 0                            | 2                                | 1                              | 0                           | 0                                           | 2                               | 2                                   | 2                             | 0                | 15              |    |

Table S16. Indicator 13: Mining and Plantation Business Units Data Processing Example

|        |      |        |                |       |          |         |                 |   |                                                             |                                                            |                                                                      |              |             |  |
|--------|------|--------|----------------|-------|----------|---------|-----------------|---|-------------------------------------------------------------|------------------------------------------------------------|----------------------------------------------------------------------|--------------|-------------|--|
| CP7228 |      |        |                |       |          |         |                 |   |                                                             |                                                            |                                                                      |              | 4           |  |
|        | A    | B      | C              | D     | E        | F       | G               | H | CL                                                          | CM                                                         | CN                                                                   | CO           | CP          |  |
|        | No.  | IDProp | Province       | IDKab | Regency  | IDKec   | District        |   | The presence of Oil and Gas Mining [exists or is not / 1-0] | The presence of Geothermal Mining [exists or is not / 1-0] | The presence of Other Mines and Plantations [exists or is not / 1-0] | Mining Index | Mining Grid |  |
| 1      |      |        |                |       |          |         |                 |   |                                                             |                                                            |                                                                      |              |             |  |
| 2      | 1    | 11     | ACEH           | 1101  | SIMEULUE | 1101010 | TEUPAH SELATAN  |   | 0                                                           | 0                                                          | 0                                                                    |              |             |  |
| 6860   | 1510 | 17     | BENGKULU       | 1704  | KAUR     | 1704010 | NASAL           |   | 0                                                           | 0                                                          | 0                                                                    | 1            |             |  |
| 7228   | 6542 | 91     | PAPUA BARAT    | 9107  | SORONG   | 9107130 | SEGET           |   | 1                                                           | 0                                                          | 0                                                                    | 1            |             |  |
| 7229   | 479  | 12     | SUMATERA UTARA | 1211  | KARO     | 1211082 | MERDEKA         |   | 0                                                           | 1                                                          | 1                                                                    | 1            |             |  |
| 7233   | 5346 | 71     | SULAWESI UTARA | 7173  | TOMOHON  | 7173010 | TOMOHON SELATAN |   | 0                                                           | 1                                                          | 1                                                                    | 1            |             |  |

Table S17. Indicator 14: Residential Conditions Data Processing Example

|        |      |        |                  |       |                  |         |                |   |                         |                                                    |  |  |  |  |  |  |  |  |  |
|--------|------|--------|------------------|-------|------------------|---------|----------------|---|-------------------------|----------------------------------------------------|--|--|--|--|--|--|--|--|--|
| CS1033 |      |        |                  |       |                  |         |                |   |                         | =IF(CR1033>99;4;IF(CR1033>95;3;IF(CR1033>90;2;1))) |  |  |  |  |  |  |  |  |  |
|        | A    | B      | C                | D     | E                | F       | G              | H | CR                      | CS                                                 |  |  |  |  |  |  |  |  |  |
|        | No.  | IDProp | Province         | IDKab | Regency          | IDKec   | District       |   | Not A Slum Dwelling [%] | Residential Conditions Grid                        |  |  |  |  |  |  |  |  |  |
| 1      |      |        |                  |       |                  |         |                |   |                         |                                                    |  |  |  |  |  |  |  |  |  |
| 2      | 1    | 11     | ACEH             | 1101  | SIMEULUE         | 1101010 | TEUPAH SELATAN |   | 99,78750531             | 4                                                  |  |  |  |  |  |  |  |  |  |
| 3      | 2    | 11     | ACEH             | 1101  | SIMEULUE         | 1101020 | SIMEULUE TIMUR |   | 96,59056774             | 3                                                  |  |  |  |  |  |  |  |  |  |
| 242    | 292  | 12     | SUMATERA UTARA   | 1201  | NIAS             | 1201062 | ULUGAWO        |   | 87,23729461             | 1                                                  |  |  |  |  |  |  |  |  |  |
| 1022   | 1421 | 16     | SUMATERA SELATAN | 1613  | MUSI RAWAS UTARA | 1613010 | ULU RAWAS      |   | 90,61654135             | 2                                                  |  |  |  |  |  |  |  |  |  |
| 1033   | 1435 | 16     | SUMATERA SELATAN | 1671  | PALEMBANG        | 1671040 | ILIR BARAT I   |   | 100                     | 4                                                  |  |  |  |  |  |  |  |  |  |

Table S18. Indicator 15: Road Access Data Processing Example

| CZ7213 = IF(CU7213=100;4;IF(CU7213>0;3;IF(CV7213>0;2;1))) |      |        |             |       |                  |         |                        |                                     |                                 |                       |                         |                   |                  |    |
|-----------------------------------------------------------|------|--------|-------------|-------|------------------|---------|------------------------|-------------------------------------|---------------------------------|-----------------------|-------------------------|-------------------|------------------|----|
|                                                           | A    | B      | C           | D     | E                | F       | G                      | H                                   | CU                              | CV                    | CW                      | CX                | CY               | CZ |
|                                                           | No.  | IDProp | Province    | IDKab | Regency          | IDKec   | District               | Asphalt / Concrete Road Surface [%] | Gravel / Stone Road Surface [%] | Soil Road Surface [%] | Other Road Surfaces [%] | Road Access Index | Road Access Grid |    |
| 1                                                         |      |        |             |       |                  |         |                        |                                     |                                 |                       |                         |                   |                  |    |
| 2                                                         | 1    | 11     | ACEH        | 1101  | SIMEULUE         | 1101010 | TEUPAH SELATAN         | 68,42105263                         | 26,31578947                     | 5,26315789            | 0                       |                   |                  |    |
| 3                                                         | 2    | 11     | ACEH        | 1101  | SIMEULUE         | 1101020 | SIMEULUE TIMUR         | 100                                 | 0                               | 0                     | 0                       |                   |                  |    |
| 7213                                                      | 1940 | 31     | DKI JAKARTA | 3101  | KEPULAUAN SERIBU | 3101020 | KEPULAUAN SERIBU UTARA | 0                                   | 0                               | 0                     | 0                       |                   |                  |    |
| 7228                                                      | 6542 | 91     | PAPUA BARAT | 9107  | SORONG           | 9107130 | SEGET                  | 0                                   | 12,5                            | 87,5                  | 0                       |                   |                  |    |
| 7230                                                      | 1617 | 18     | LAMPUNG     | 1802  | TANGGAMUS        | 1802031 | ULUBELU                | 43,75                               | 18,75                           | 37,5                  | 0                       |                   |                  |    |

Table S19. Indicator 16: Regional Finance Data Processing Example

| DI2 = IF(DH2>0,671;4;IF(DH2>0;3;IF(DH2>0,671;2;1))) |     |        |                |       |                 |         |                     |                        |                                    |                                                |                                |                                            |                                                        |                    |                       |
|-----------------------------------------------------|-----|--------|----------------|-------|-----------------|---------|---------------------|------------------------|------------------------------------|------------------------------------------------|--------------------------------|--------------------------------------------|--------------------------------------------------------|--------------------|-----------------------|
|                                                     | No. | IDProp | Province       | IDKab | Regency         | IDKec   | District            | Independence Index [%] | Index of Regional Fiscal Space [%] | Regional Operational Ability Index [numerical] | z-score Independence Index [%] | z-score Index of Regional Fiscal Space [%] | z-score Regional Operational Ability Index [numerical] | z-score mean index | Regional Finance Grid |
| 1                                                   |     |        |                |       |                 |         |                     |                        |                                    |                                                |                                |                                            |                                                        |                    |                       |
| 2                                                   | 1   | 11     | ACEH           | 1101  | SIMEULUE        | 1101010 | TEUPAH SELATAN      | 7,628524679            | 34,0665062                         | 1,0185817                                      | -0,34343                       | -0,19749                                   | -0,55517                                               | -0,37              | 2                     |
| 12                                                  | 11  | 11     | ACEH           | 1102  | ACEH SINGKIL    | 1102010 | PULAU BANYAK        | 6,019444202            | 28,5925267                         | 0,948387416                                    | -0,50075                       | -0,70147                                   | -1,34288                                               | -0,85              | 1                     |
| 456                                                 | 597 | 12     | SUMATERA UTARA | 1218  | SERDANG BEDAGAI | 1218021 | SERBAUDI            | 12,44273166            | 31,3303991                         | 1,143090606                                    | 0,12725                        | -0,4484                                    | 0,84204                                                | 0,17               | 3                     |
| 532                                                 | 709 | 12     | SUMATERA UTARA | 1275  | MEDAN           | 1275080 | MEDAN BARU          | 38,40617686            | 51,7732707                         | 0,987994561                                    | 2,67156                        | 1,43275                                    | -0,89842                                               | 1,07               | 4                     |
| 596                                                 | 733 | 12     | SUMATERA UTARA | 1278  | GUNUNGSITOLI    | 1278010 | GUNUNGSITOLI IDANOI | 4,191045323            | 30,3121537                         | 1,015829379                                    | -0,67951                       | -0,54315                                   | -0,58606                                               | -0,6               | 2                     |

Table S20. Indicator 17: Population Data Processing Example

DN349      =IF(DL349<250;1;IF(DL349<500;2;IF(DL349<1000;3;4)))

|     | A   | B      | C              | D     | E             | F       | G              | H                                            | DK                                                        | DL                  | DM                 | DN |
|-----|-----|--------|----------------|-------|---------------|---------|----------------|----------------------------------------------|-----------------------------------------------------------|---------------------|--------------------|----|
|     | No. | IDProp | Province       | IDKab | Regency       | IDKec   | District       | Total<br>Population<br>[million<br>inhabitan | Population<br>Density<br>[million<br>inhabitants/<br>km2] | Population<br>Index | Population<br>Grid |    |
| 1   |     |        |                |       |               |         |                |                                              |                                                           |                     |                    |    |
| 2   | 1   | 11     | ACEH           | 1101  | SIMEULUE      | 1101010 | TEUPAH SELATAN | 934                                          | 42                                                        |                     |                    | 1  |
| 12  | 11  | 11     | ACEH           | 1102  | ACEH SINGKIL  | 1102010 | PULAU BANYAK   | 4610                                         | 306,91                                                    |                     |                    | 2  |
| 41  | 47  | 11     | ACEH           | 1104  | ACEH TENGGARA | 1104030 | BAMBEL         | 1739                                         | 746,27                                                    |                     |                    | 3  |
| 44  | 50  | 11     | ACEH           | 1104  | ACEH TENGGARA | 1104040 | BABUSSALAM     | 29830                                        | 3146,41                                                   |                     |                    | 4  |
| 349 | 454 | 12     | SUMATERA UTARA | 1210  | DAIRI         | 1210030 | SIDIKALANG     | 50868                                        | 719,8                                                     |                     |                    | 3  |
