# Supplementary material for: Proposal of the Indonesian Framework for Telecommunications Infrastructure Based on Network and Socioeconomic Indicators
Source: MDPI journal article supplement (doi:10.3390/informatics10020044), 2023-05-12
Supplement: s1 [file s1 › File S7 (Appendix G).pdf]

## S7: Appendix G - Abbreviation

Table S3 shows the abbreviation or variable definition for Figure 6: “The Proposed Indonesian Framework for Telecommunications Infrastructure (developed from the Sabater Framework [46], Stern [47], Mayer [48], and ITU [3]).” Table 7: “Correlation Matrix”, Table 8: “Sixteen Combinations of  $4 \times 4$  Matrix and Pseudocode Applications Adapted from [55]”, Table 9: “Postulate to Determine the Grid-Reference Index G1, G2, G3, and G4.”, and Table 10: “Results of Correlation Matrix of 7232 Districts in Indonesia” of the manuscript.

**Table S3.** Variable Definition for Figure 6 and Table 7-10 of The Manuscript

| No. | Variable | Definition                                                                            |
|-----|----------|---------------------------------------------------------------------------------------|
| 1.  | G1       | grid #1                                                                               |
| 2.  | G2       | grid #2                                                                               |
| 3.  | G3       | grid #3                                                                               |
| 4.  | G4       | grid #4                                                                               |
| 5.  | x-axis   | telecommunications networks                                                           |
| 6.  | y-axis   | socioeconomic                                                                         |
| 7.  | N        | 2G Coverage                                                                           |
| 8.  | O        | 3G Coverage                                                                           |
| 9.  | P        | 4G Coverage                                                                           |
| 10. | T        | DL Speed Average in 3 Months                                                          |
| 11. | U        | UL Speed Average in 3 Months                                                          |
| 12. | V        | Latency Average in 3 Months                                                           |
| 13. | W        | Jitter Average in 3 Months                                                            |
| 14. | AA       | 2G BTS                                                                                |
| 15. | AB       | 3G NodeB                                                                              |
| 16. | AC       | 4G eNodeB                                                                             |
| 17. | AG       | electricity users from state electricity companies (PLN)                              |
| 18. | AH       | electricity users are not from state electricity companies (personal/private/non-PLN) |
| 19. | AL       | elementary school                                                                     |
| 20. | AM       | junior high school                                                                    |
| 21. | AN       | high school                                                                           |
| 22. | AO       | college                                                                               |
| 23. | AS       | the existence of mall                                                                 |
| 24. | AT       | market presence                                                                       |
| 25. | AU       | number of shops or stalls                                                             |
| 26. | AV       | number of minimarkets                                                                 |
| 27. | AW       | number of food stalls or <i>warteg</i>                                                |
| 28. | BB       | quantity of hotels/inns                                                               |
| 29. | BE       | number of hospitals                                                                   |
| 30. | BF       | number of health centers or <i>puskesmas</i>                                          |
| 31. | BG       | number of clinics                                                                     |
| 32. | BM       | percentage of KUD                                                                     |
| 33. | BN       | number of banks                                                                       |

|     |    |                                              |
|-----|----|----------------------------------------------|
| 34. | BS | <20 persons                                  |
| 35. | BT | 20-99 persons                                |
| 36. | BU | >99 persons                                  |
| 37. | BY | other tours                                  |
| 38. | BZ | tourist village                              |
| 39. | CA | nature tourism                               |
| 40. | CB | artificial tourism                           |
| 41. | CC | cultural tourism                             |
| 42. | CD | monument tour                                |
| 43. | CE | beach and artificial tours                   |
| 44. | CF | religious tourism                            |
| 45. | CG | historical excursions                        |
| 46. | CH | pilgrimage tour                              |
| 47. | CL | the existence of oil and gas mining          |
| 48. | CM | the existence of geothermal mining           |
| 49. | CN | the existence of other mines and plantations |
| 50. | CR | not a slum dwelling                          |
| 51. | CU | asphalt/concrete road surface                |
| 52. | CV | gravel/stone road surface                    |
| 53. | CW | soil road surface                            |
| 54. | CX | other road surfaces                          |
| 55. | DH | z-score mean index                           |
| 56. | DK | population                                   |
| 57. | DL | population density                           |

## REFERENCES

- [3] *ICT Regulation Toolkit Module 4: Universal Access and Service*; Infodev\_World\_Bank\_and\_International\_Telecommunication\_Union, 2010. Available online: <http://www.ictregulationtoolkit.org> (accessed on 24 December 2022).
- [46] Navas-Sabater, J.; Dymond, A.; Juntunen, N. *Telecommunications and Information Services for the Poor: Toward a Strategy for Universal Access*; no. Book, Whole; World Bank Publications: Washington, DC, USA, 2001. (In English)
- [47] Stern, P. A.; Townsend, D. "New Models for Universal Access in Latin America," in "Regulatel/World Bank (PPIAF)/ECLAC Project on Universal Access for Telecommunications in Latin America " World Bank, 2006. Available online: [http://www.kiwanja.net/database/document/report\\_universal\\_access\\_LA.pdf](http://www.kiwanja.net/database/document/report_universal_access_LA.pdf) (accessed on 27 September 2022).
- [48] Williams, M.D.J.; Mayer, R.; Mingos, M. *Africa's ICT Infrastructure: Building on the Mobile Revolution*; no. Book, Whole; World Bank Publications: Herndon, VA, USA, 2011. (In English)
- [55] Christina, A.; Gunawan, D.; Suryanegara, M. "Pseudocode Categorization of Indonesian Districts Using a 4x4 Matrix of Telecommunication and Socioeconomic Networks (in the original language (Bahasa): "Pseudocode Kategorisasi Kecamatan Se-Indonesia Berdasarkan Matriks 4x4 Jaringan Telekomunikasi Dan Sosial Ekonomi") with Copyright Number EC002022107233 ", ed. Indonesia: Ministry of Law and Human Rights, 2022. Available online: <https://pdki-indonesia.dgip.go.id/detail/EC002022107233?type=copyright&keyword=Pseudocode+Kategorisasi+Kecamatan+se-Indonesia+berdasarkan+Matriks+4x4+Jaringan+Telekomunikasi+dan+Sosial+Ekonomi> (accessed on 1 January 2023).
