# Supplementary figures and images for: Proposal of the Indonesian Framework for Telecommunications Infrastructure Based on Network and Socioeconomic Indicators
Source: MDPI journal article supplement (doi:10.3390/informatics10020044), 2023-05-12

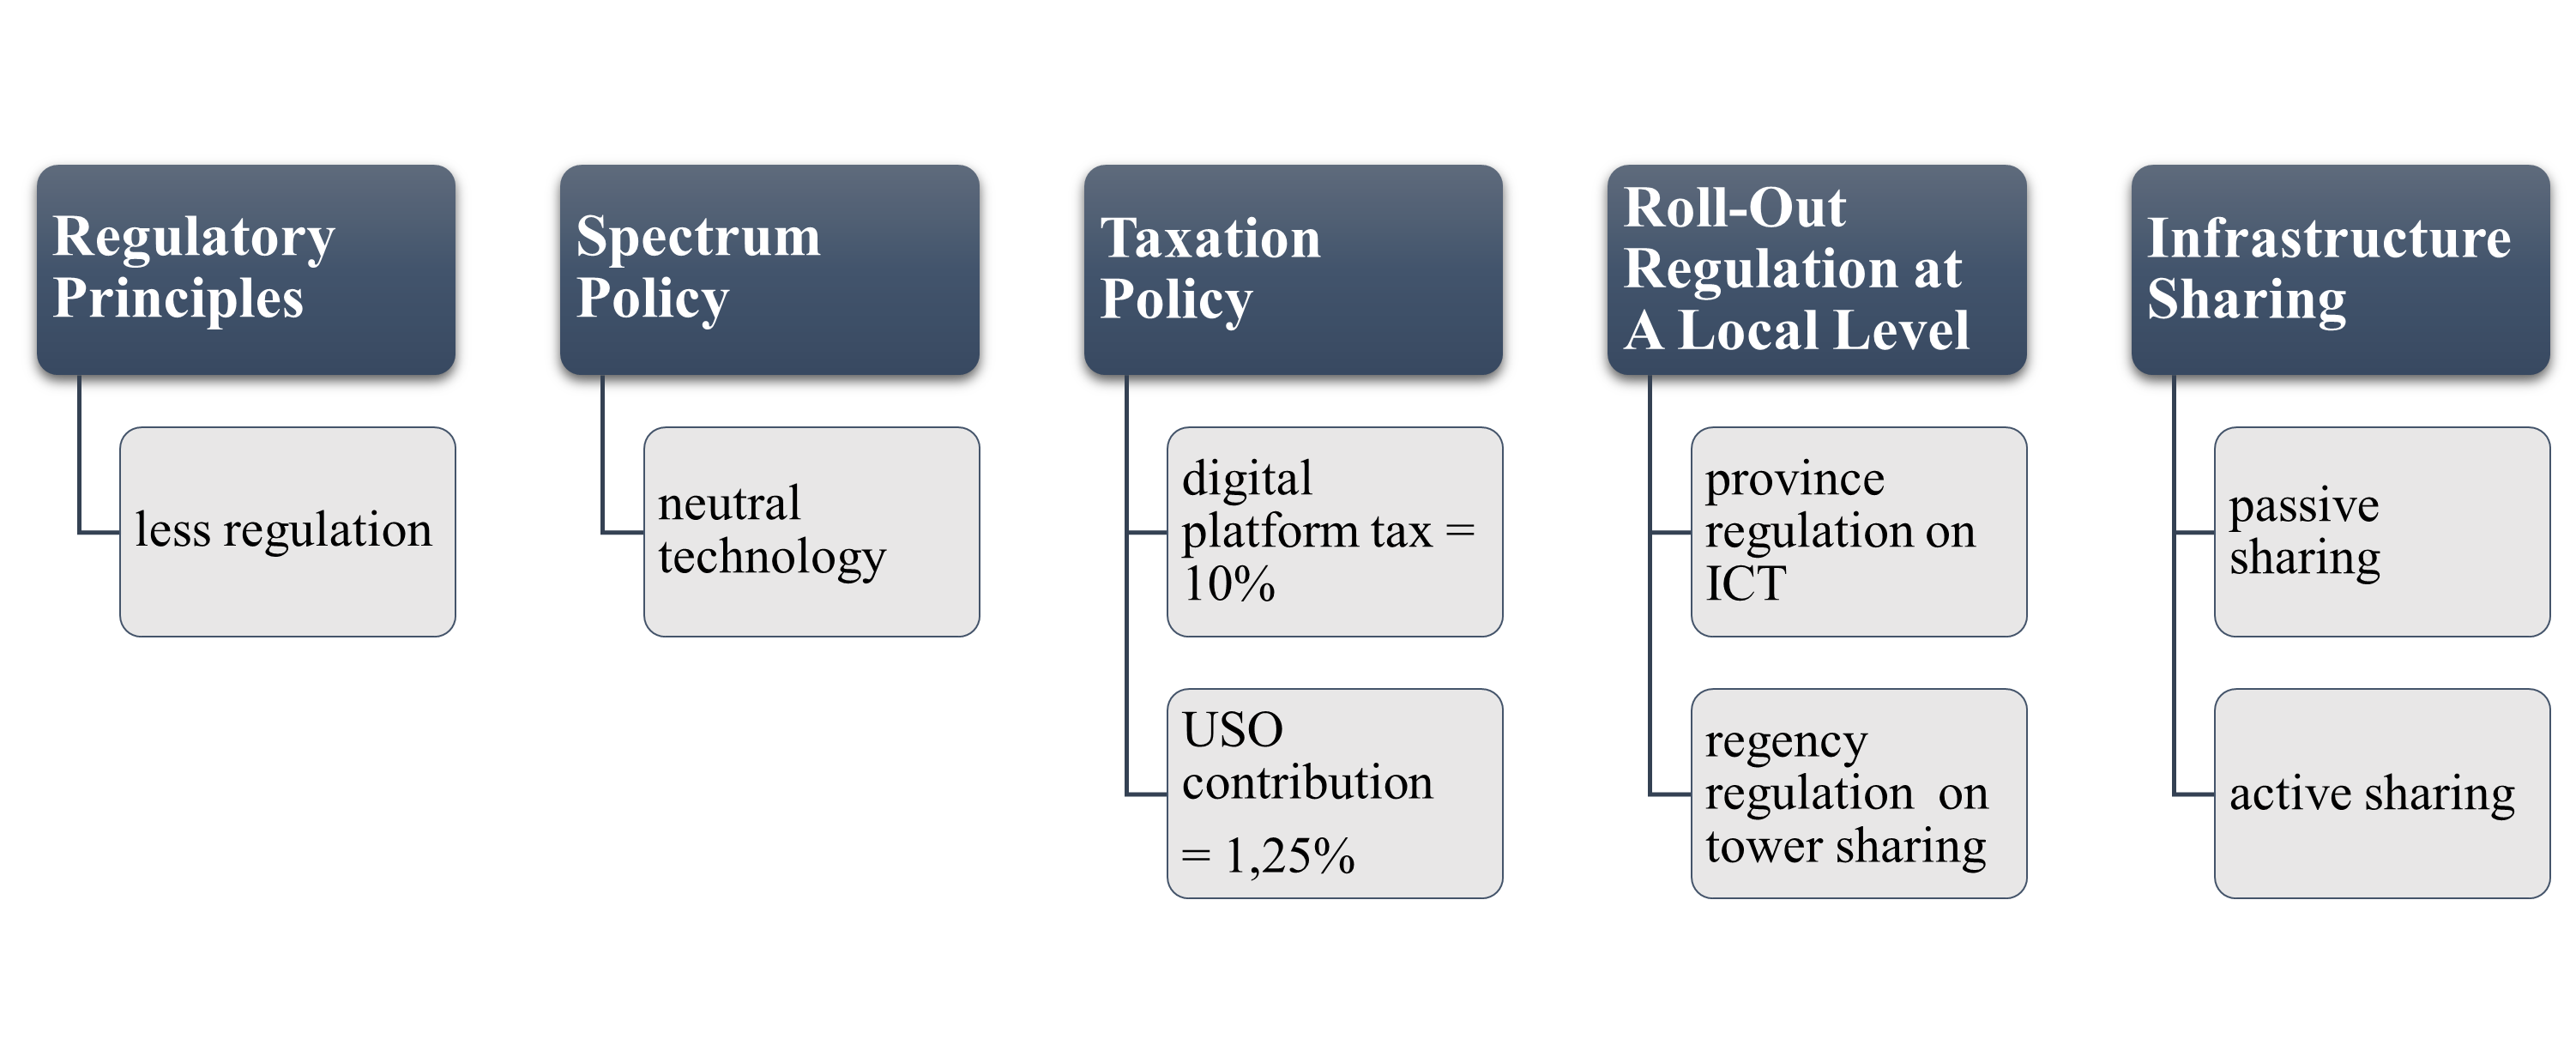

Supplement: s1 [file s1 › Figure S1.tif]

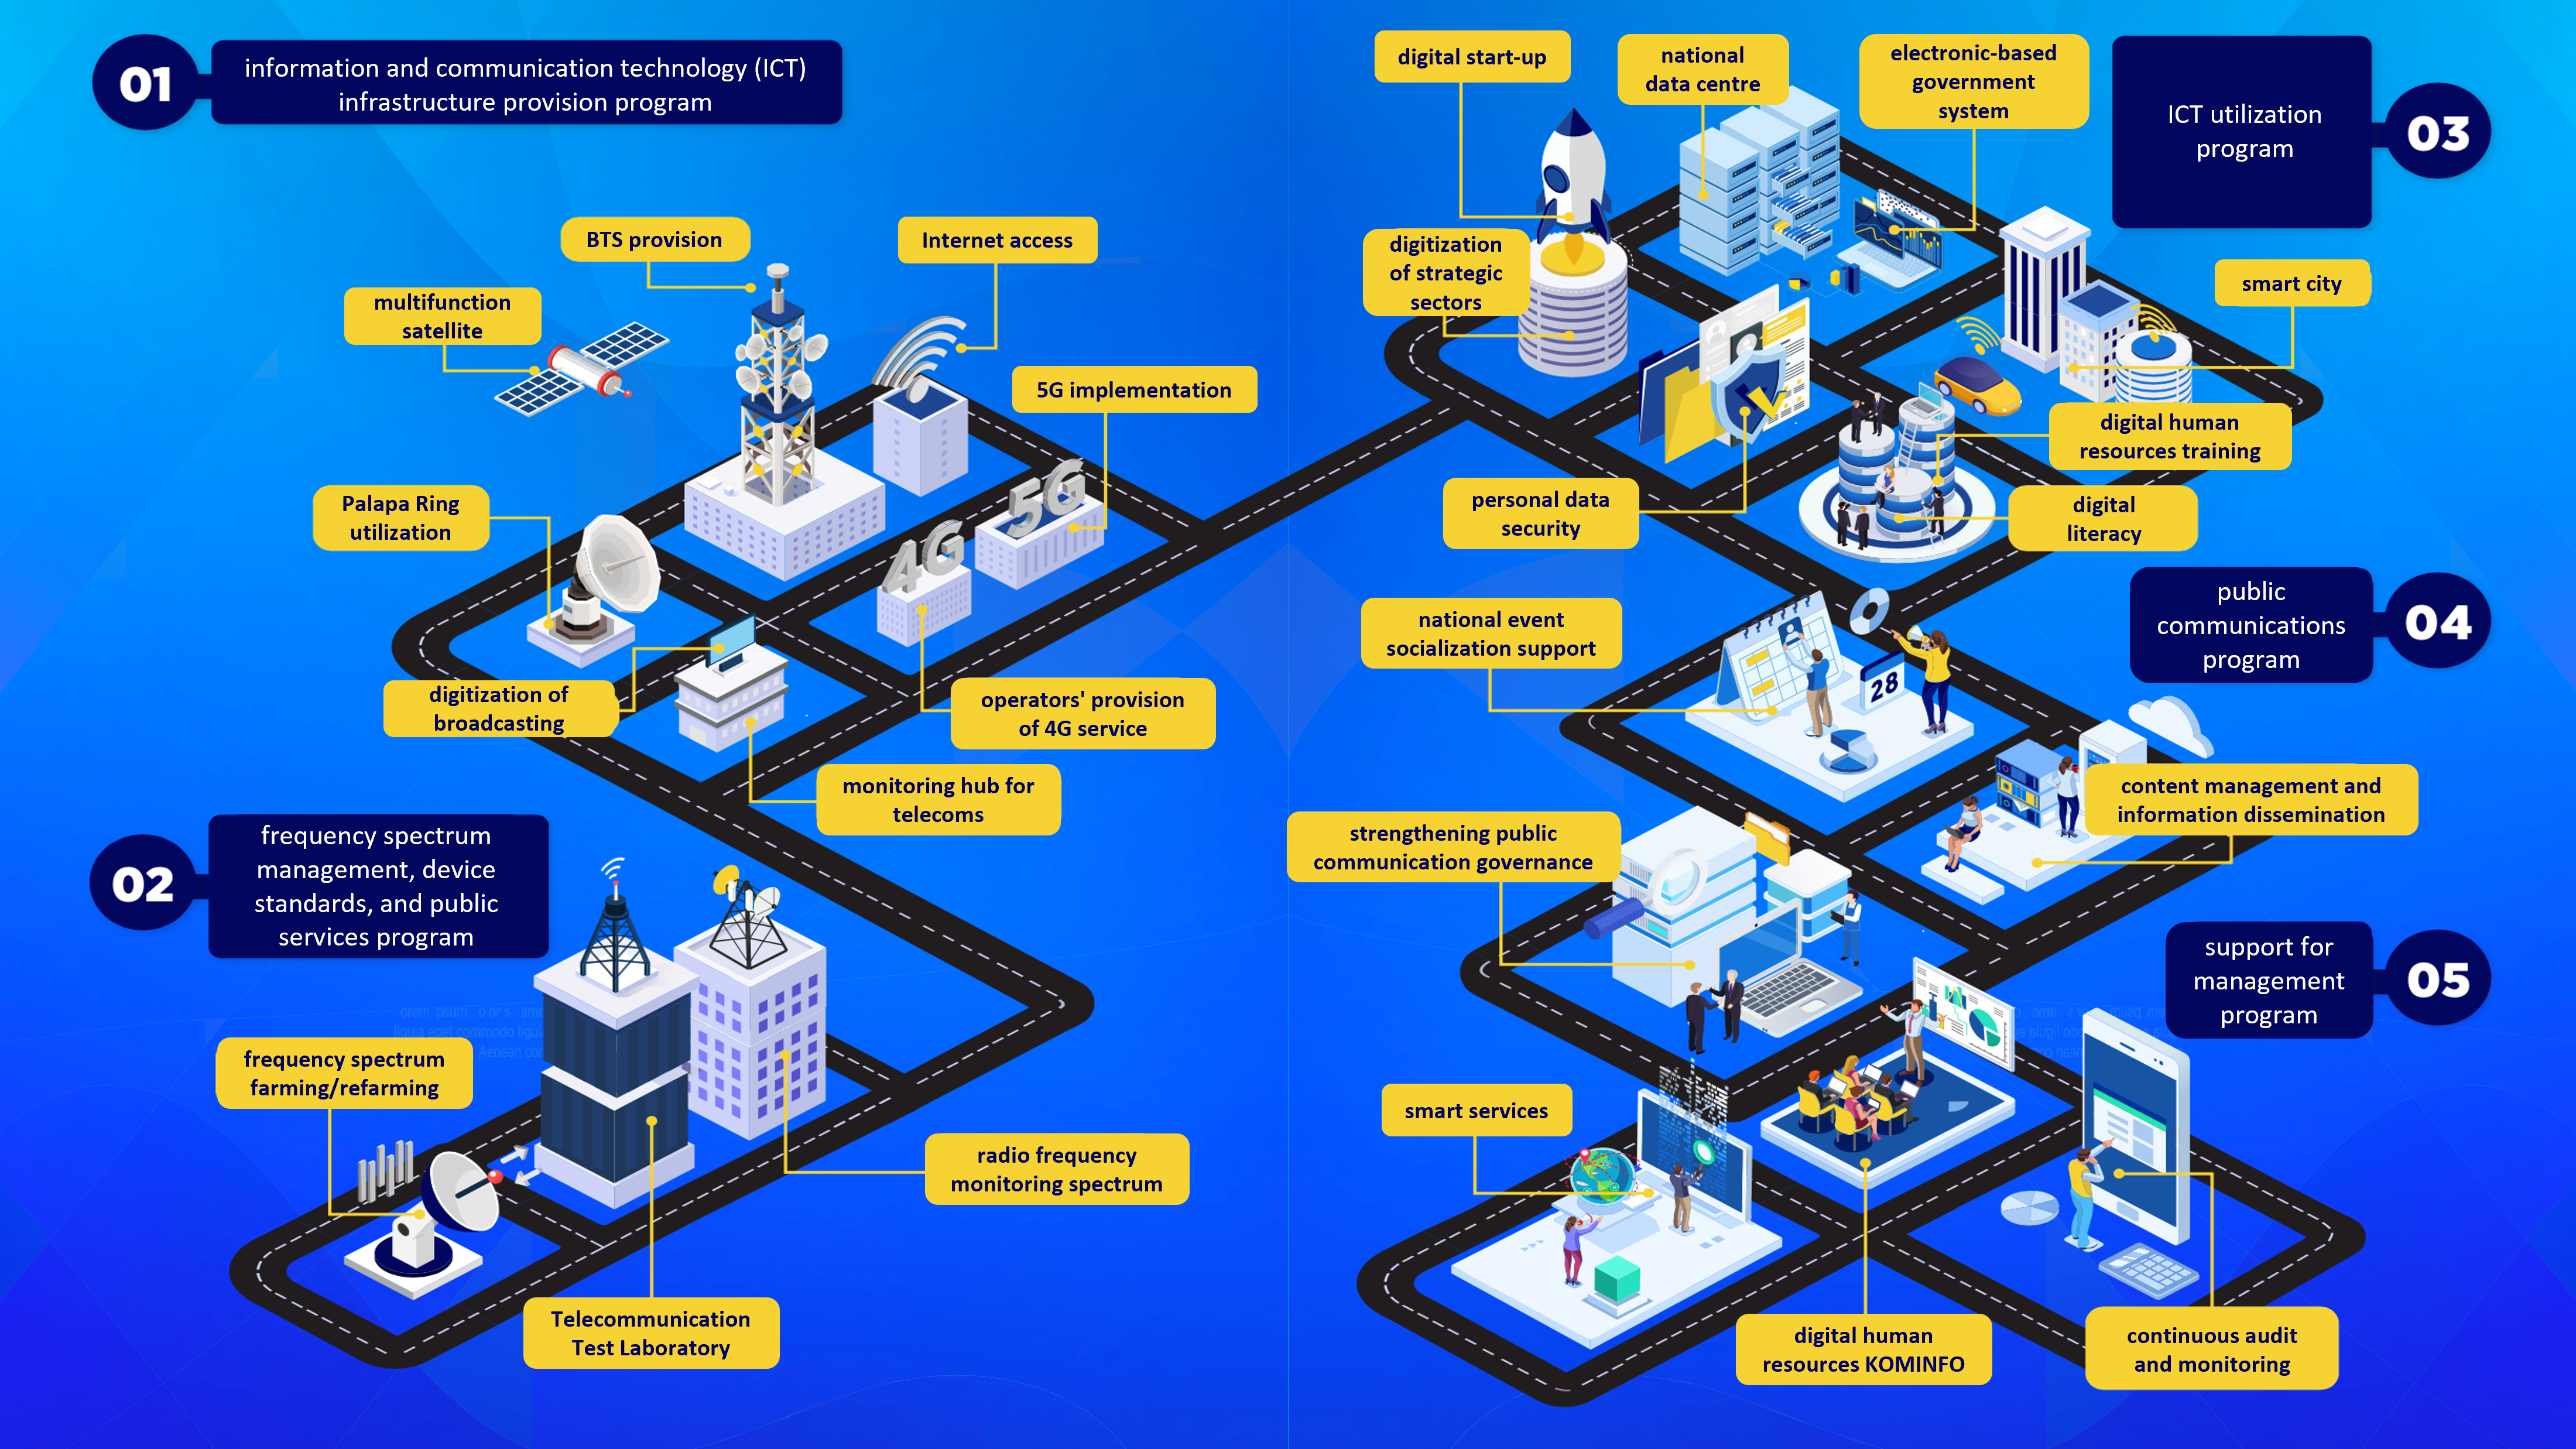

Supplement: s1 [file s1 › Figure S10.tif]

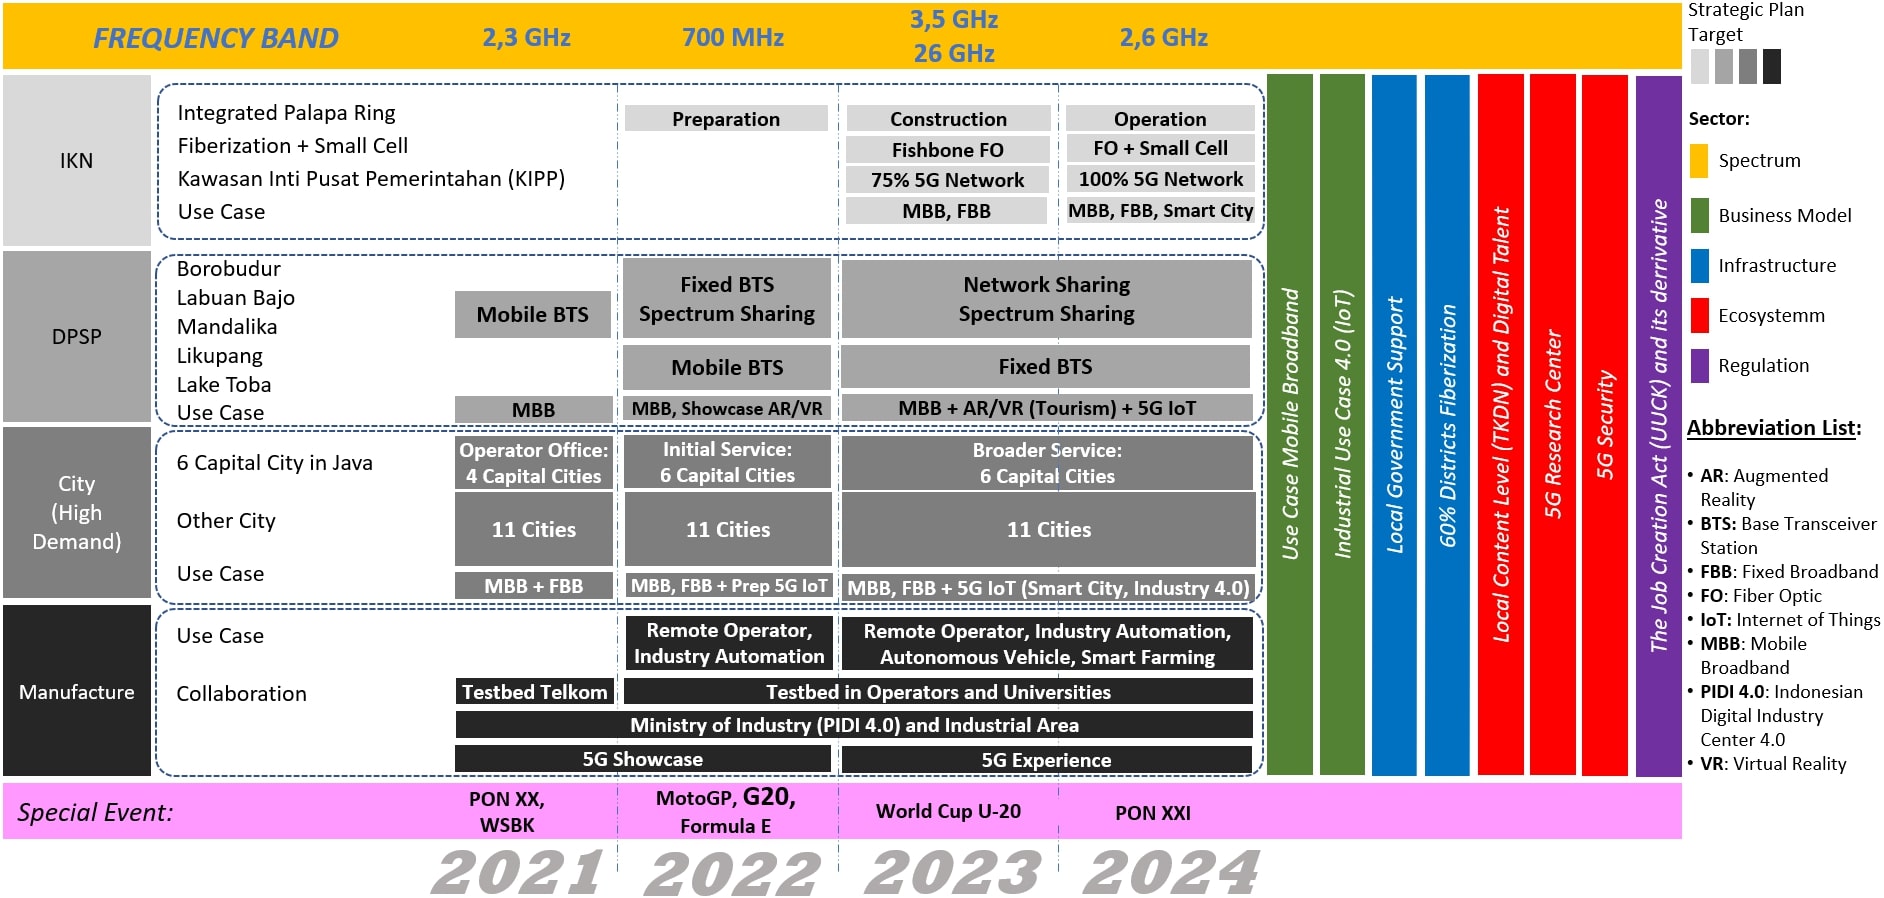

Supplement: s1 [file s1 › Figure S11.jpg]

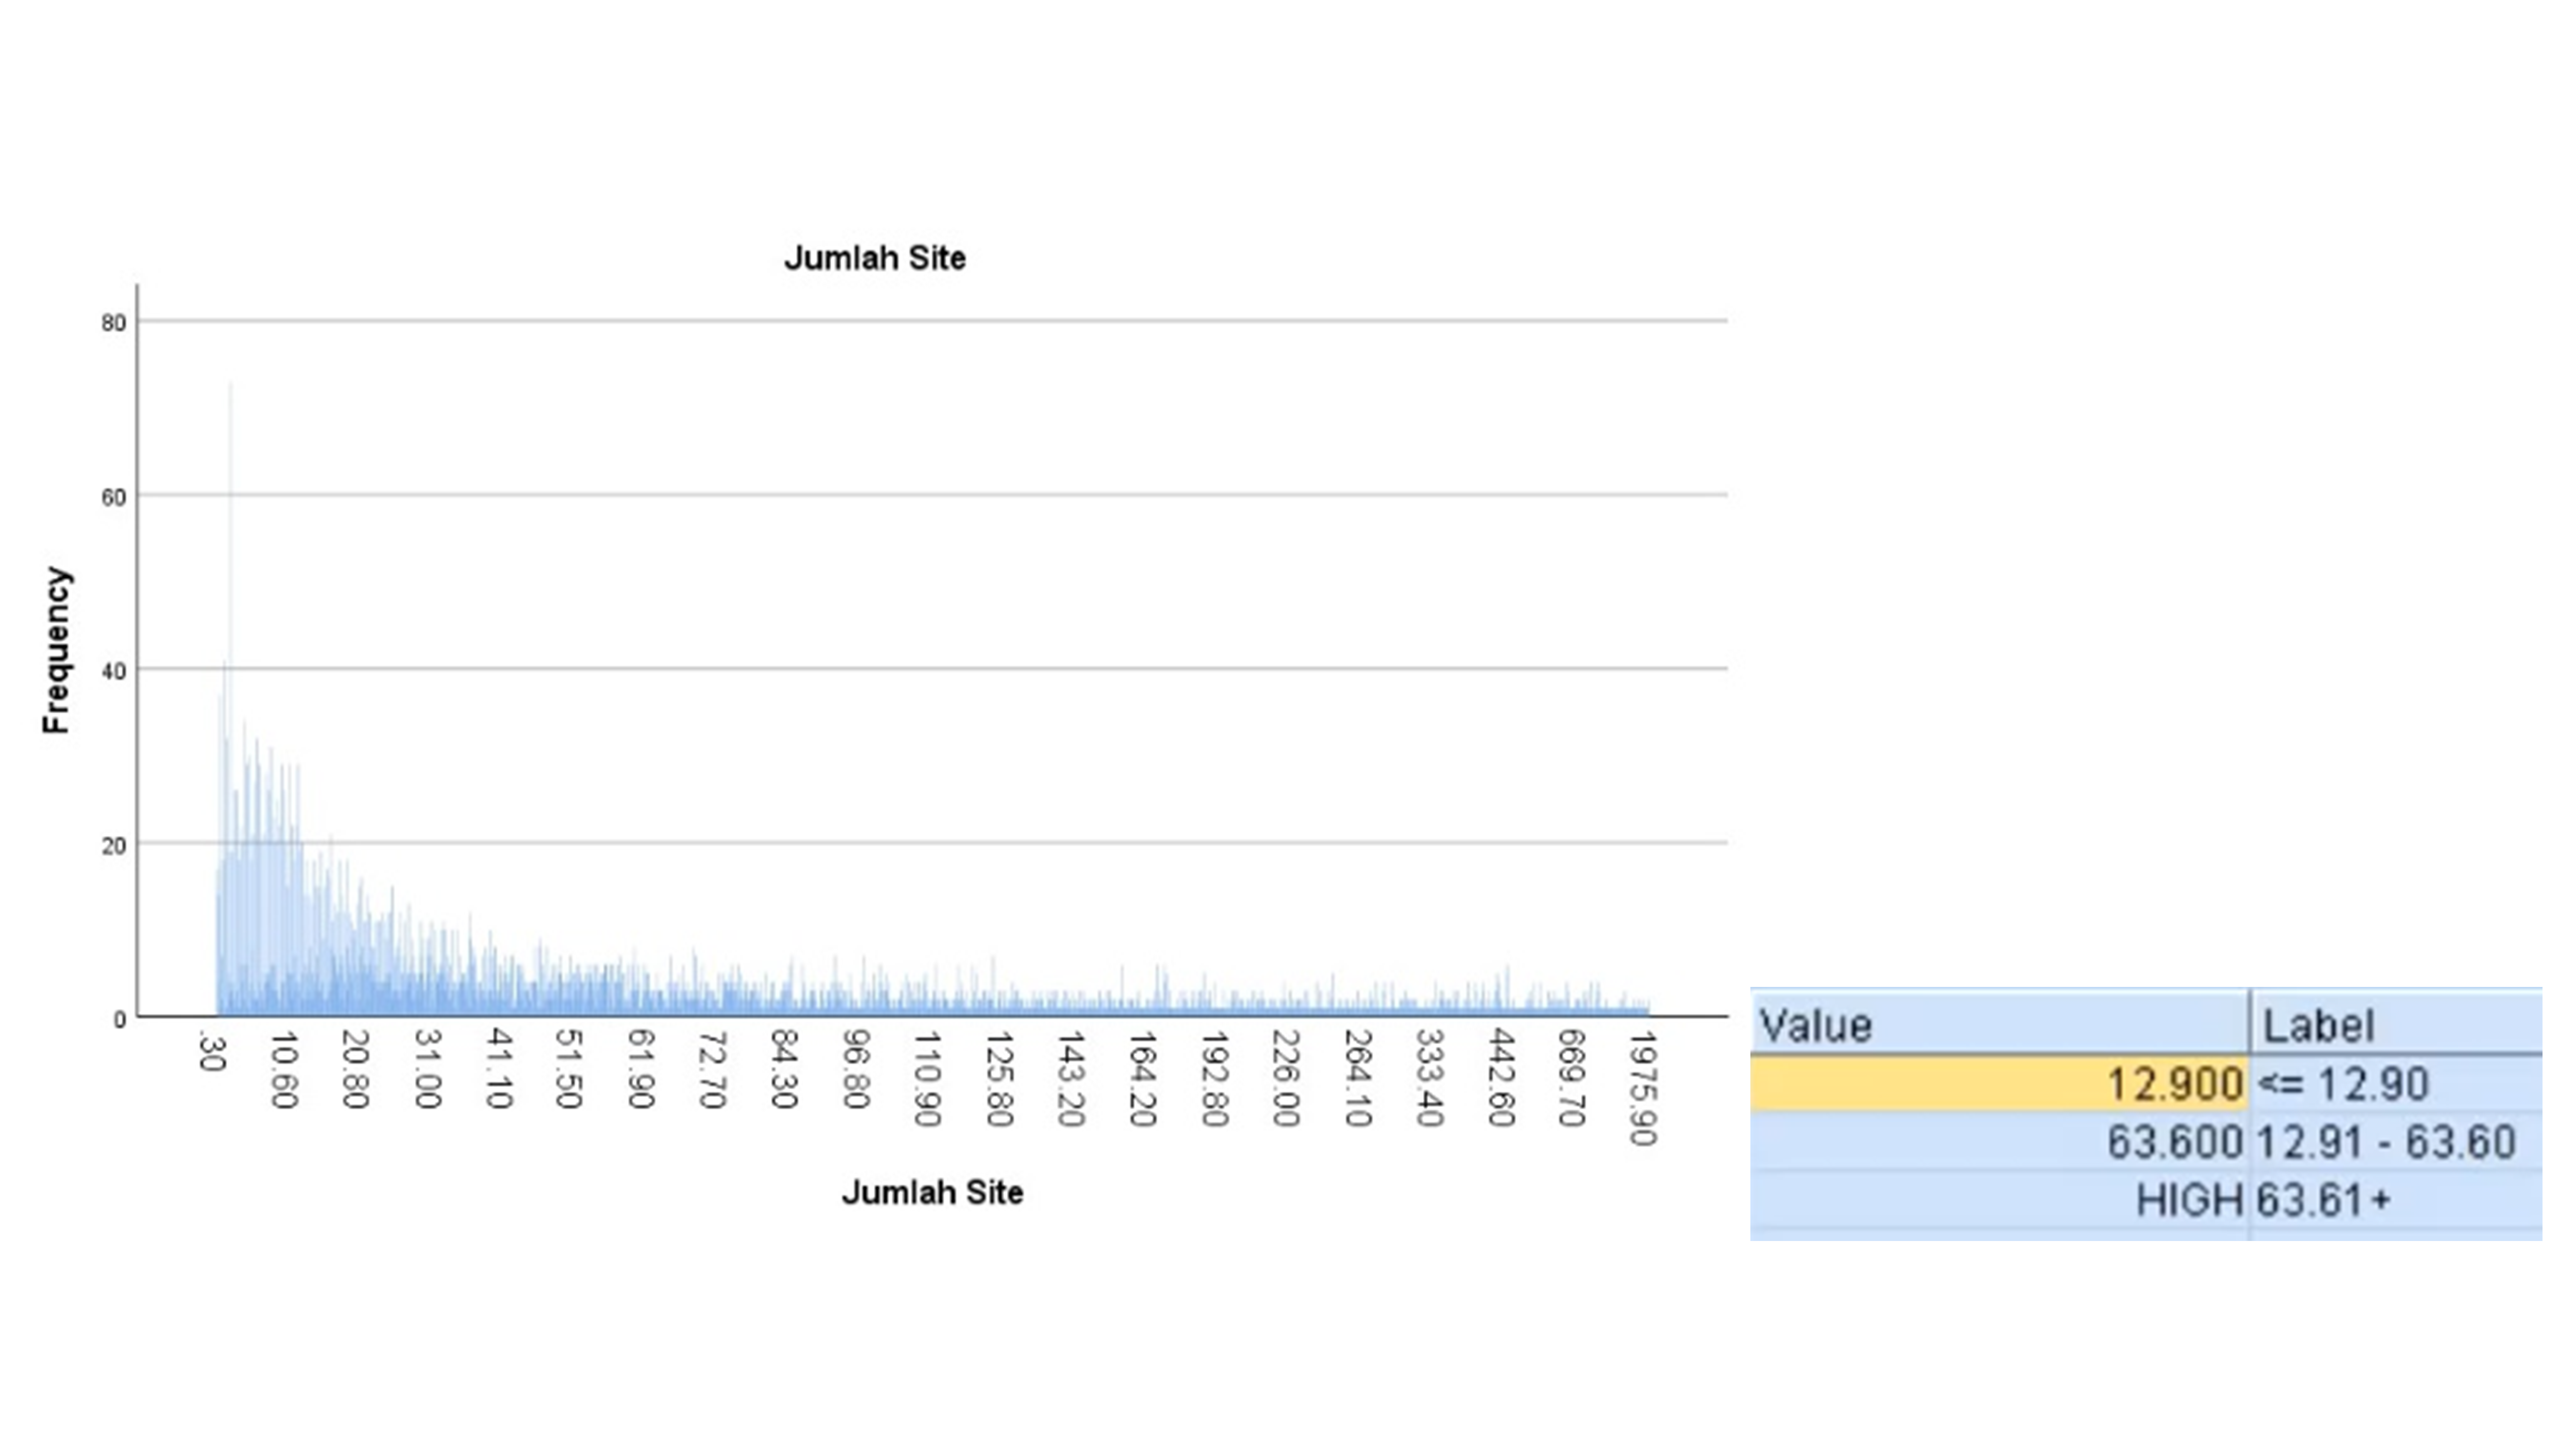

Supplement: s1 [file s1 › Figure S12.tif]

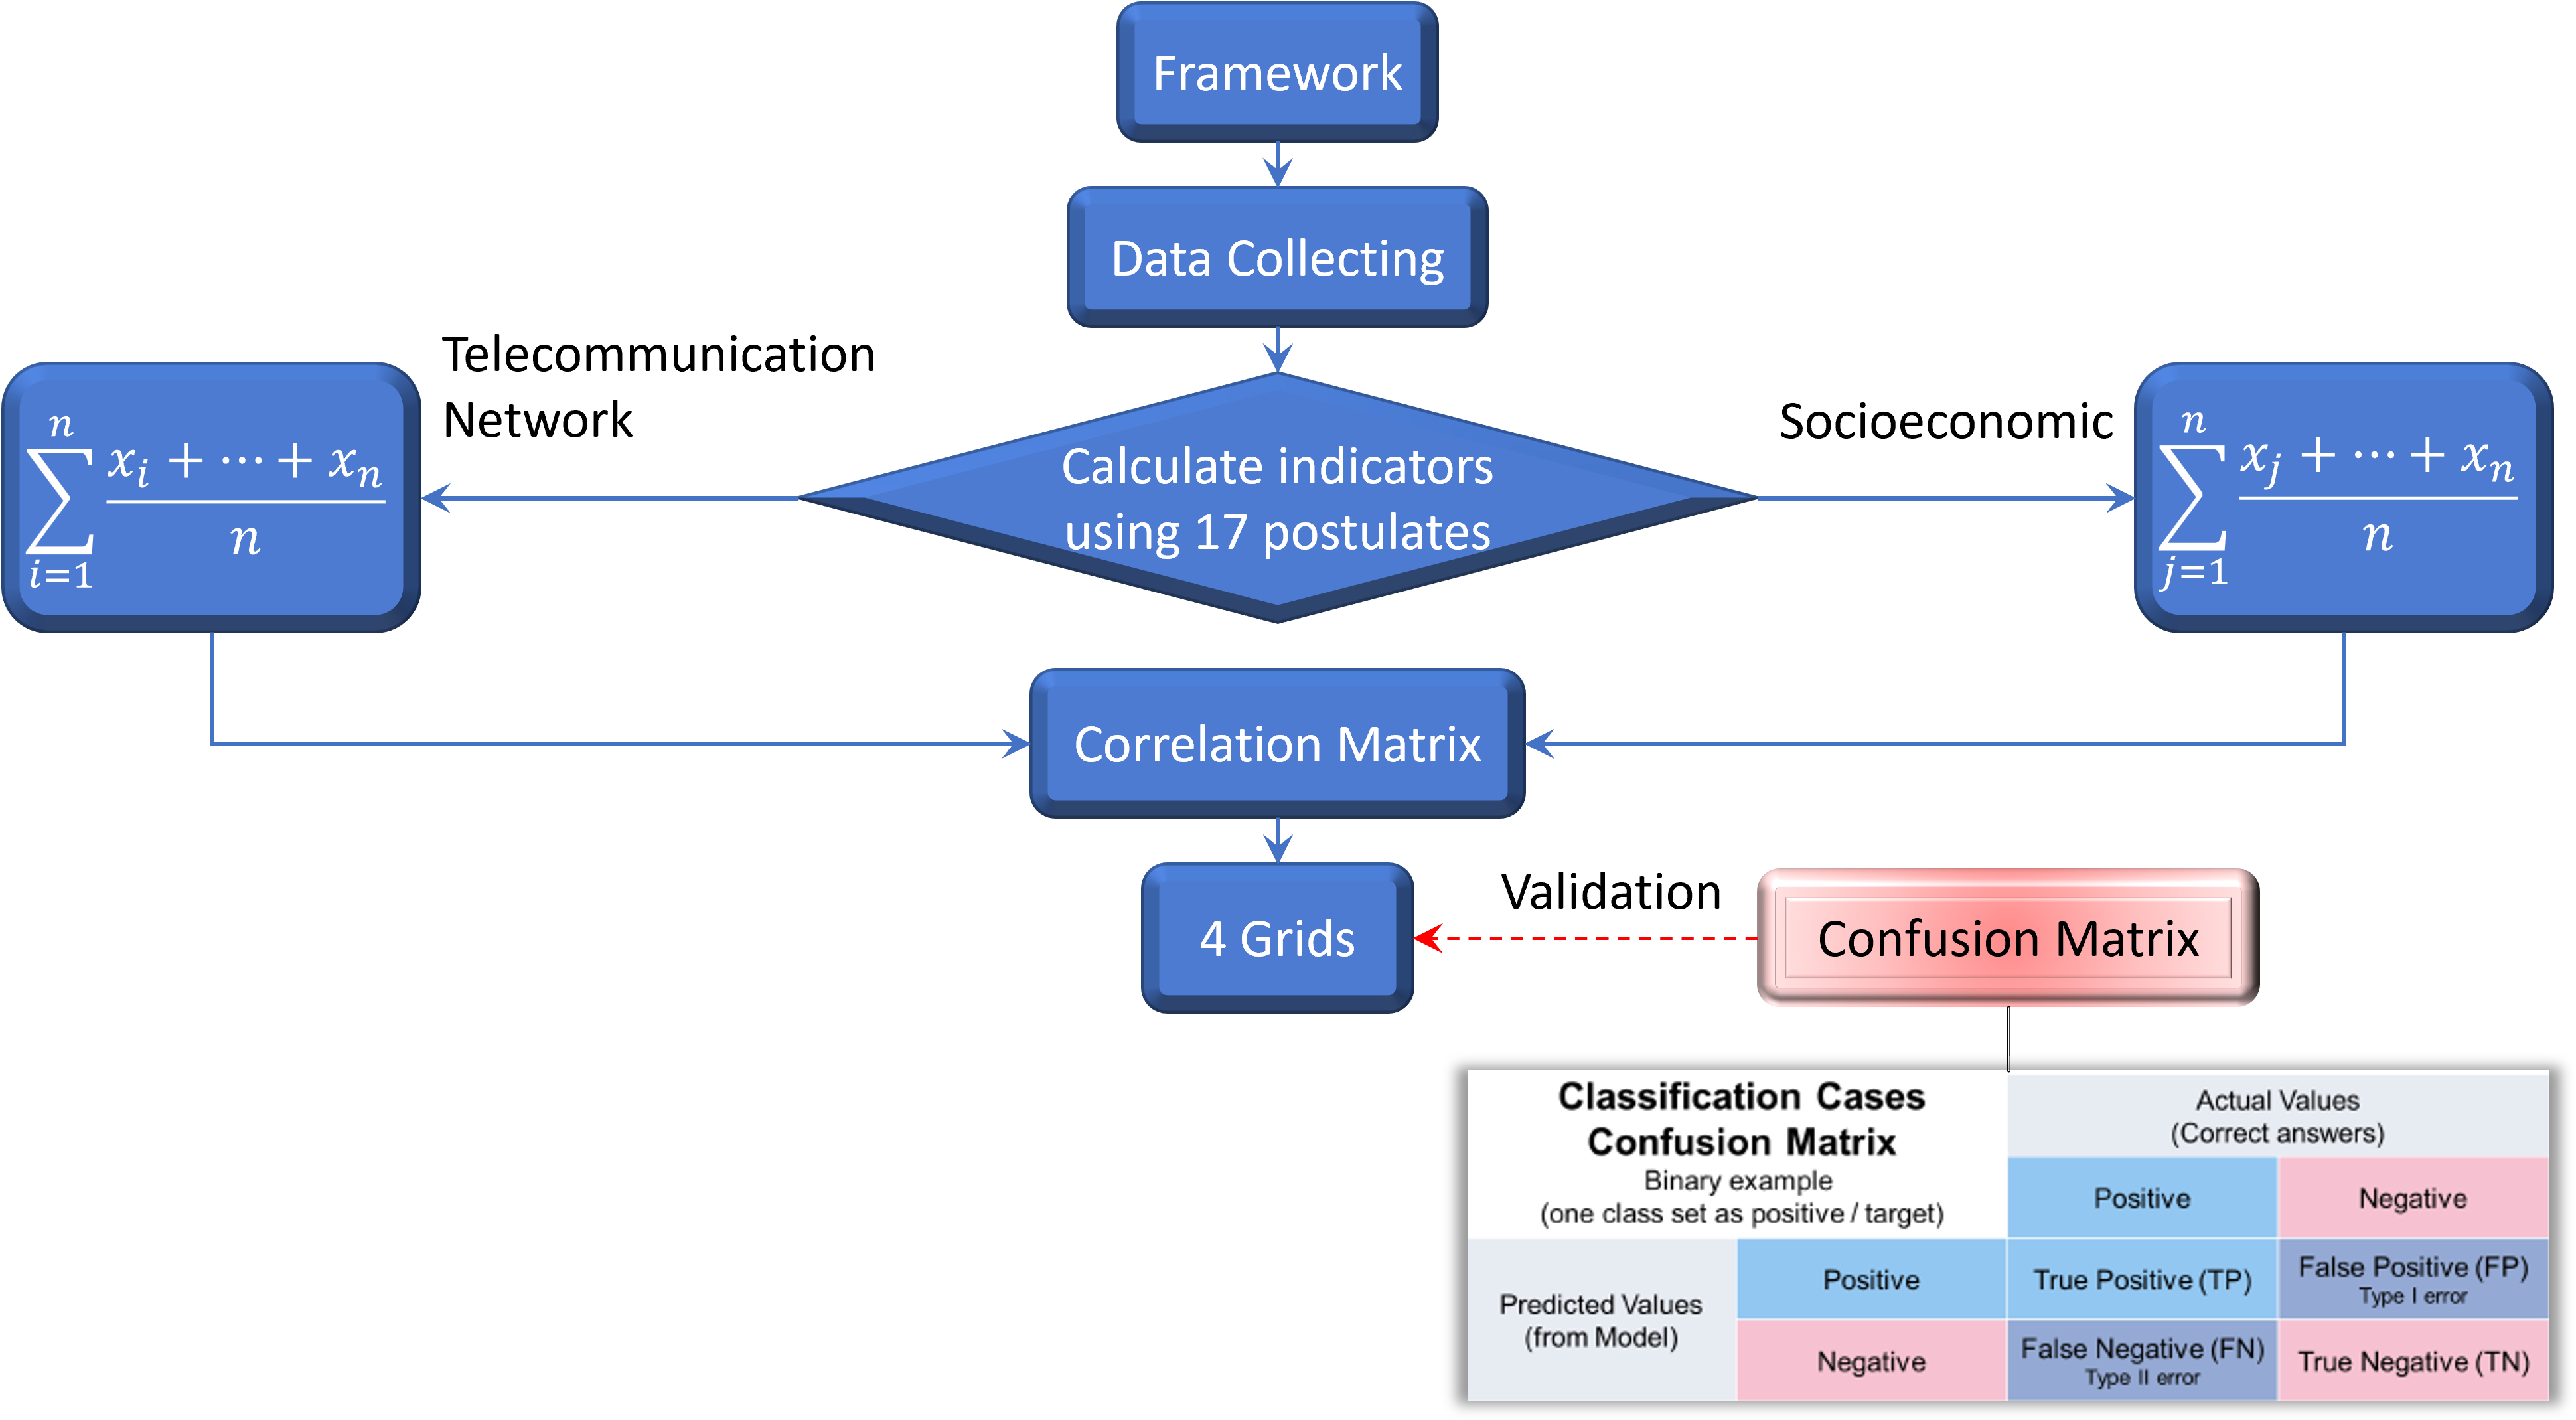

Supplement: s1 [file s1 › Figure S13.tif]

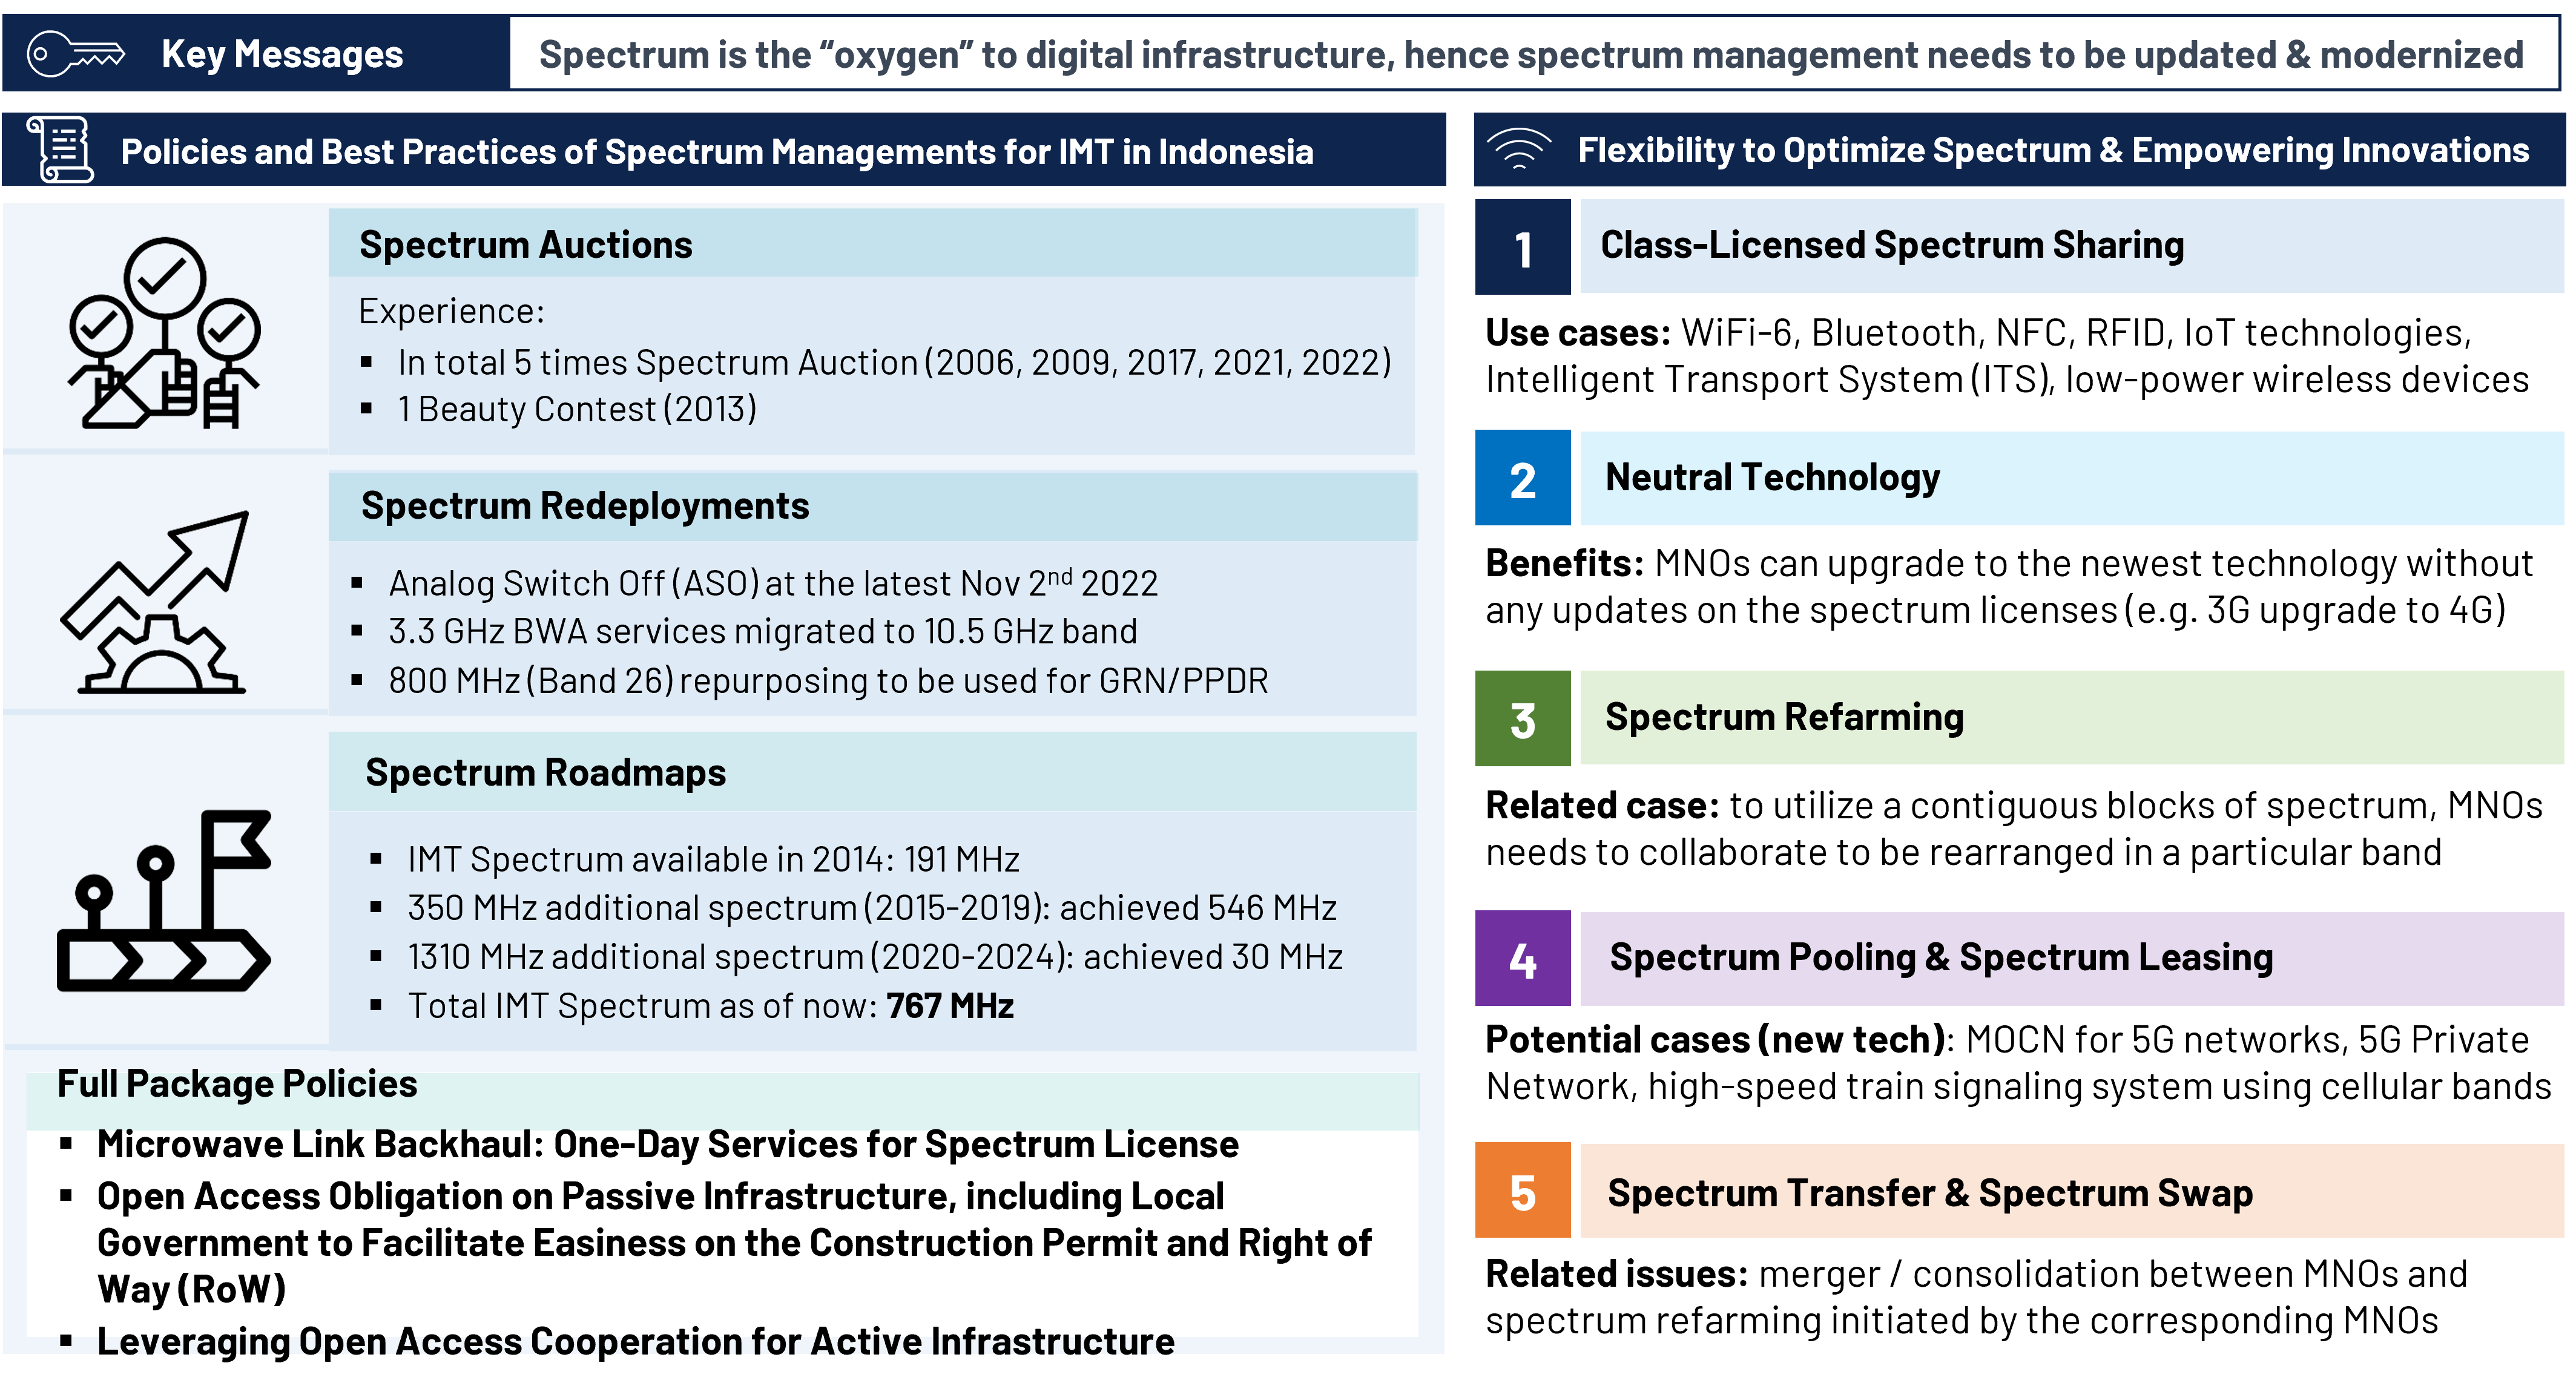

Supplement: s1 [file s1 › Figure S2.tif]

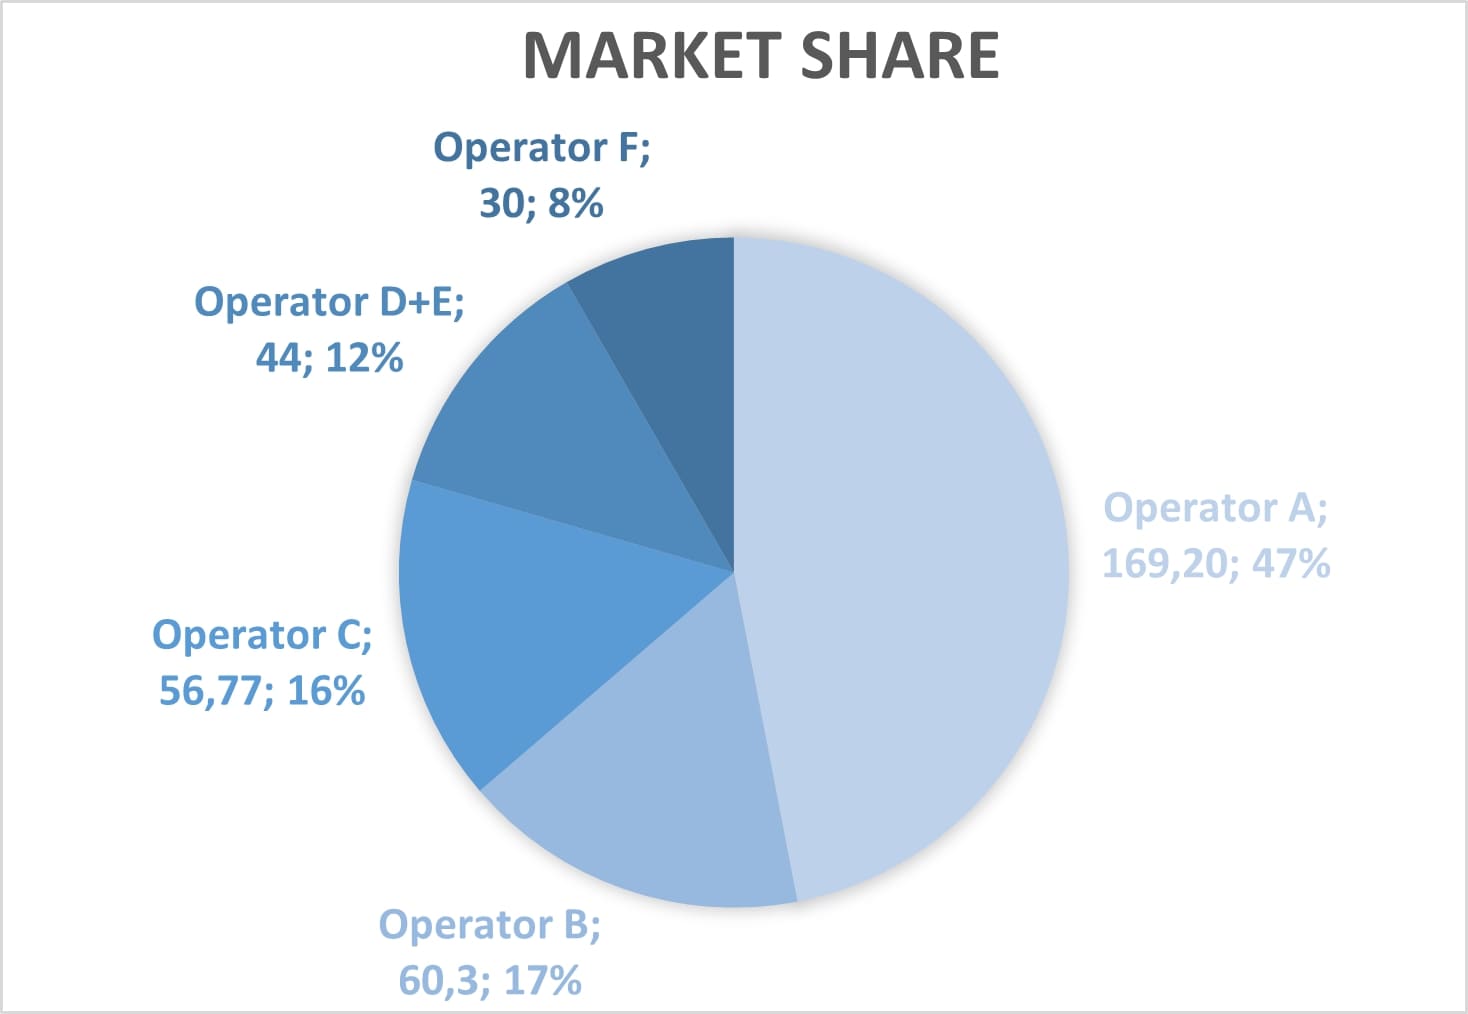

Supplement: s1 [file s1 › Figure S3.jpg]

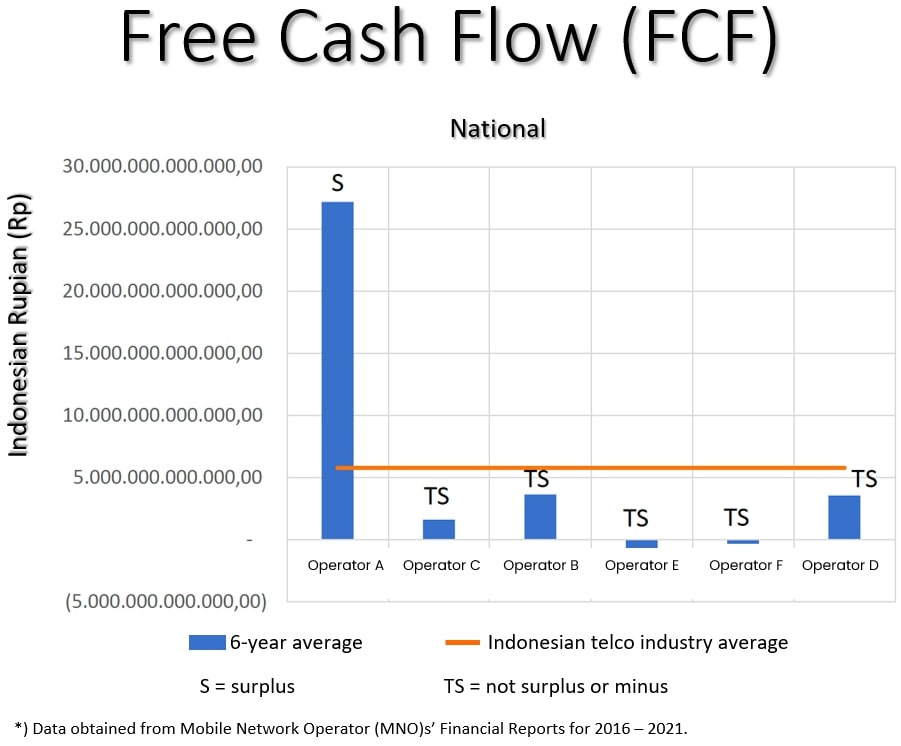

Supplement: s1 [file s1 › Figure S4 (FCF).jpg]

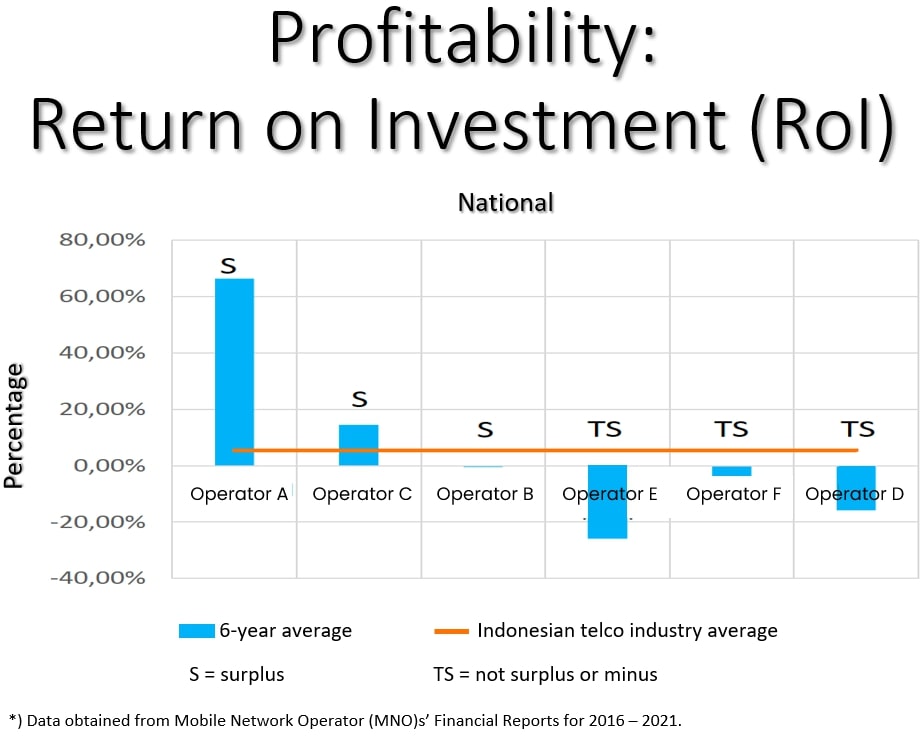

Supplement: s1 [file s1 › Figure S5 (RoI).jpg]

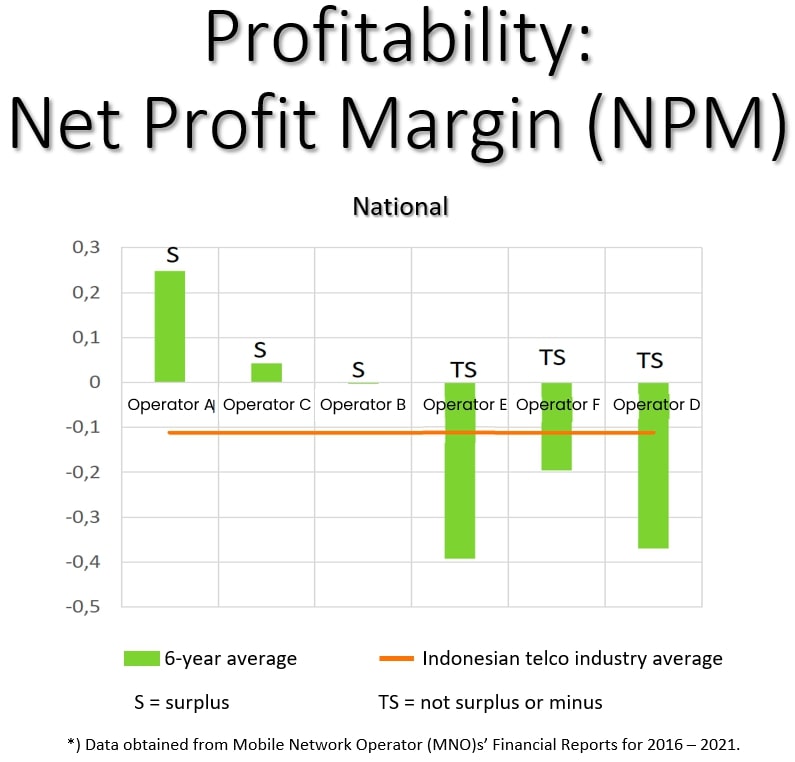

Supplement: s1 [file s1 › Figure S6 (NPM).jpg]

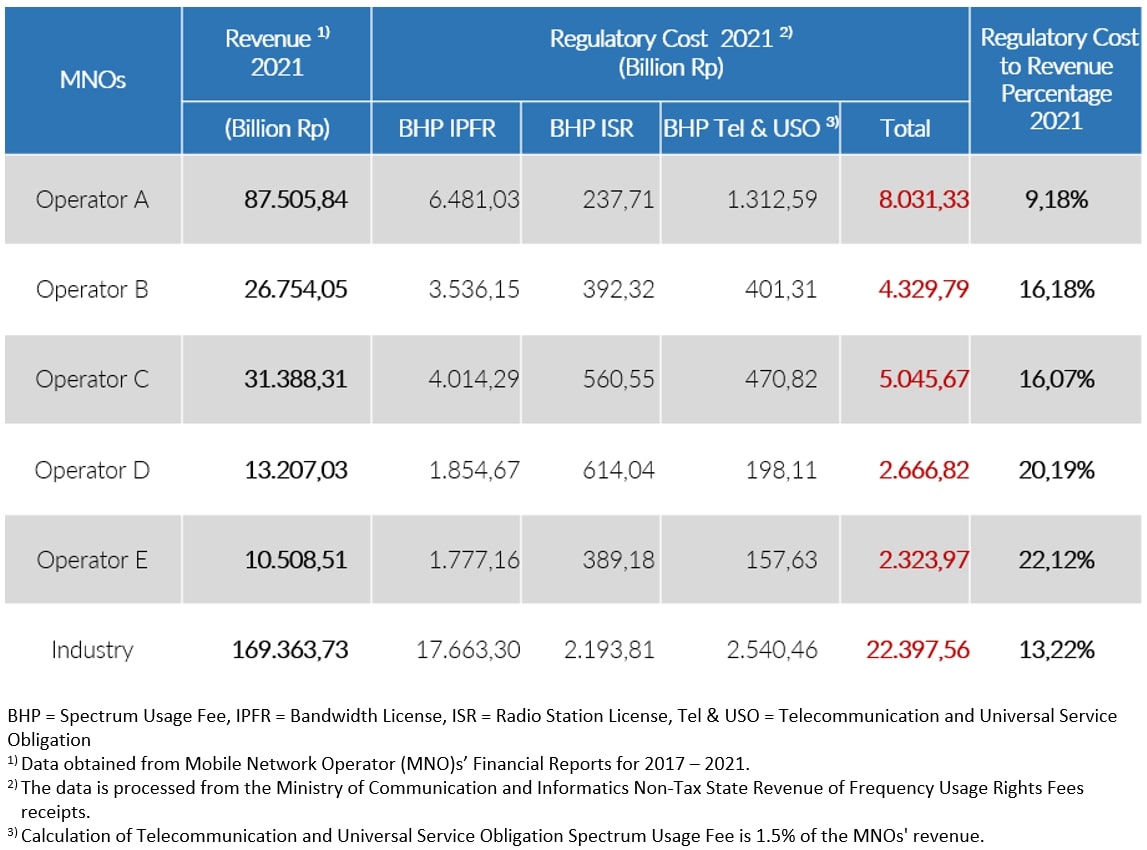

Supplement: s1 [file s1 › Figure S7.jpg]

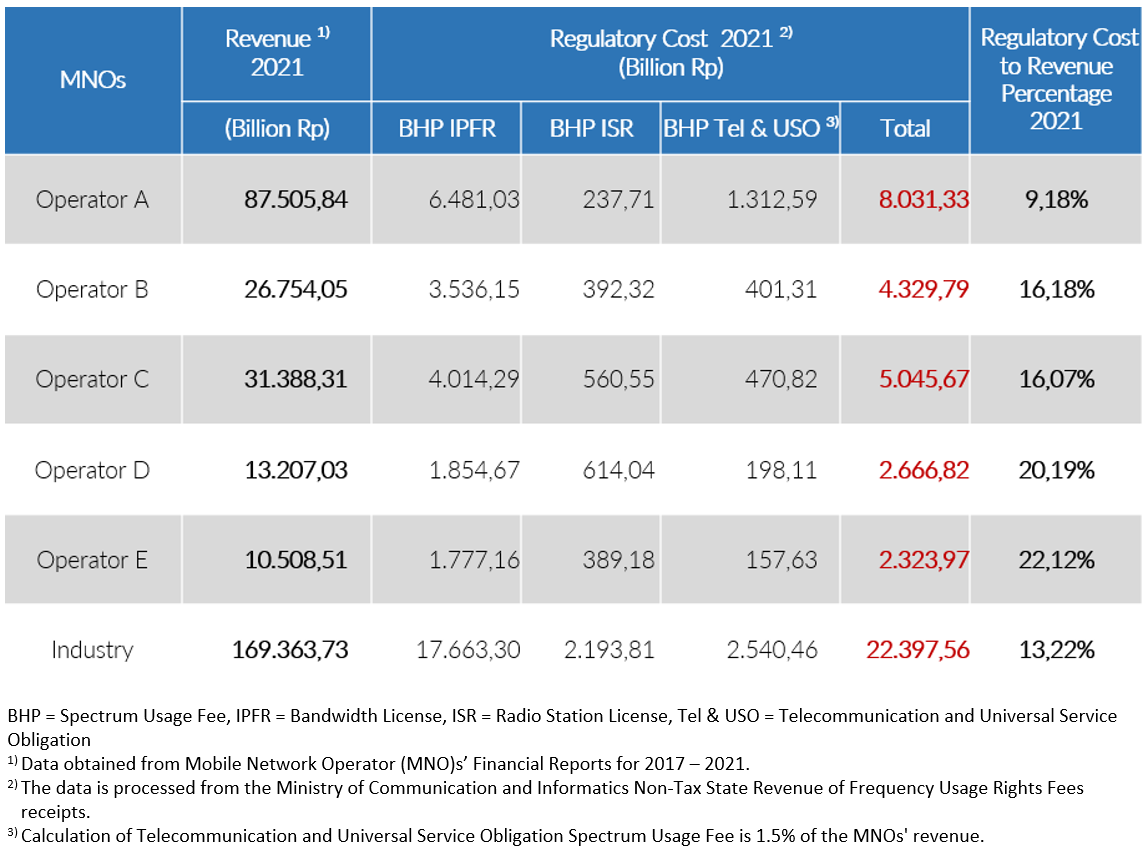

Supplement: s1 [file s1 › Figure S7.PNG]

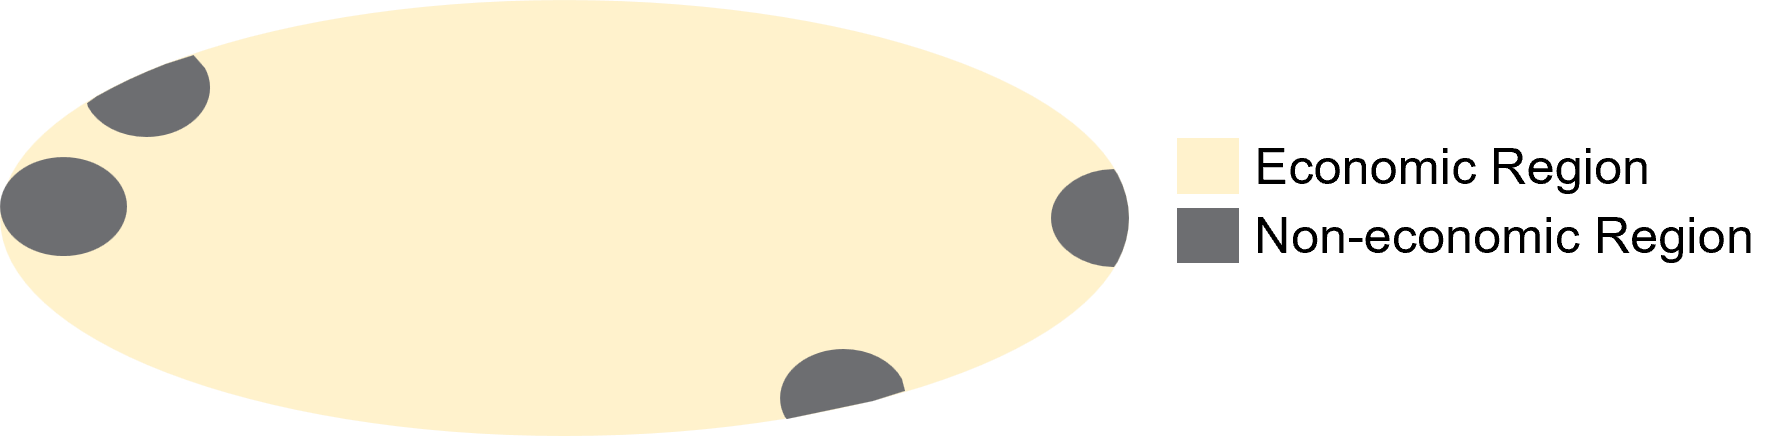

Supplement: s1 [file s1 › Figure S8.tif]

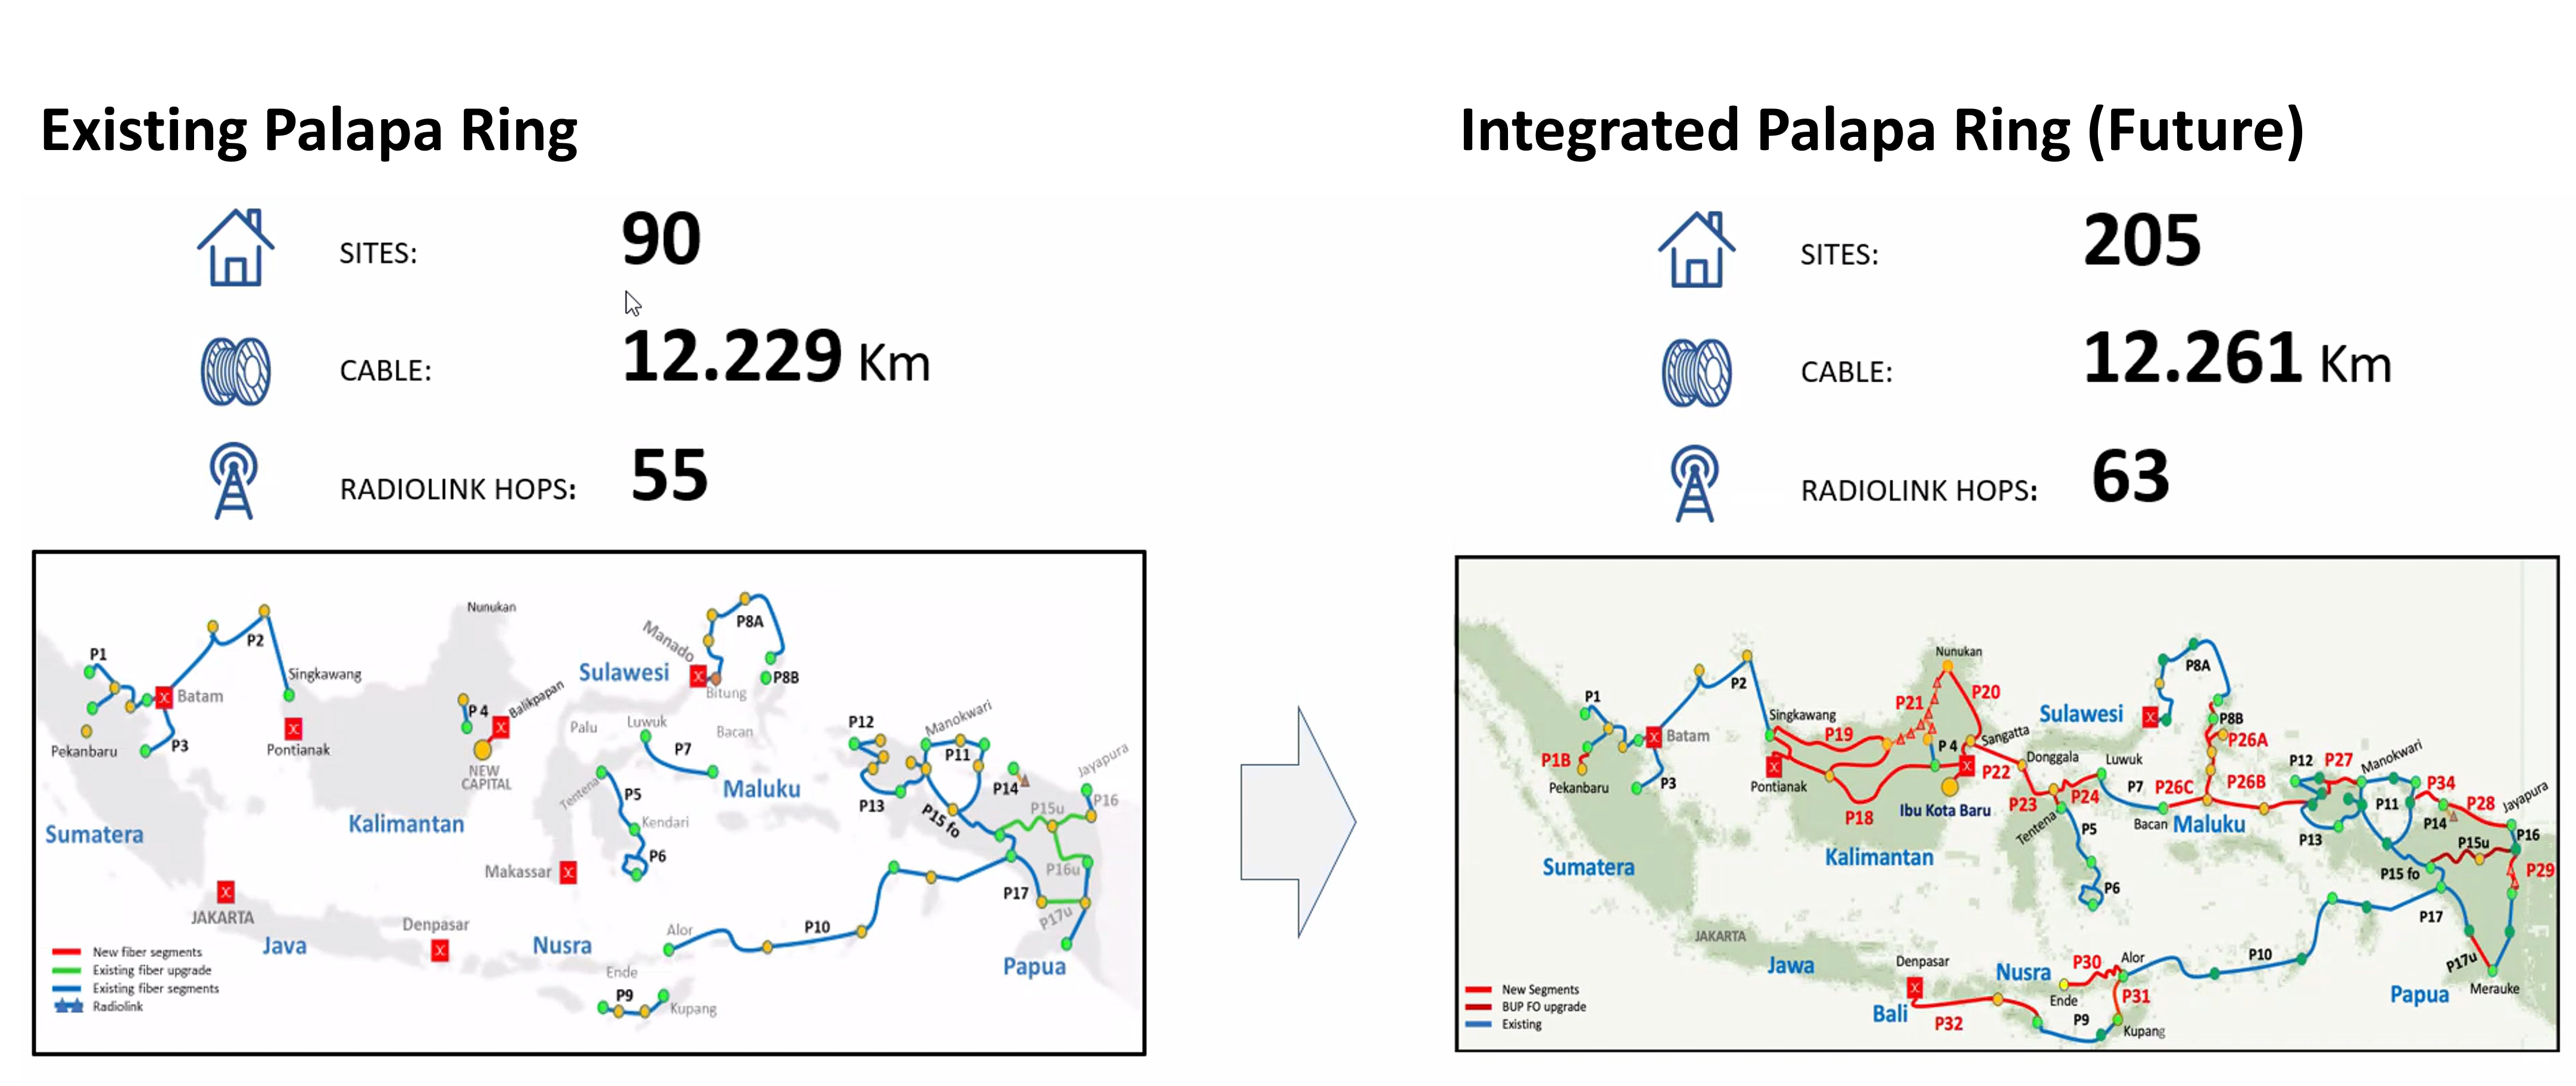

Supplement: s1 [file s1 › Figure S9.tif]

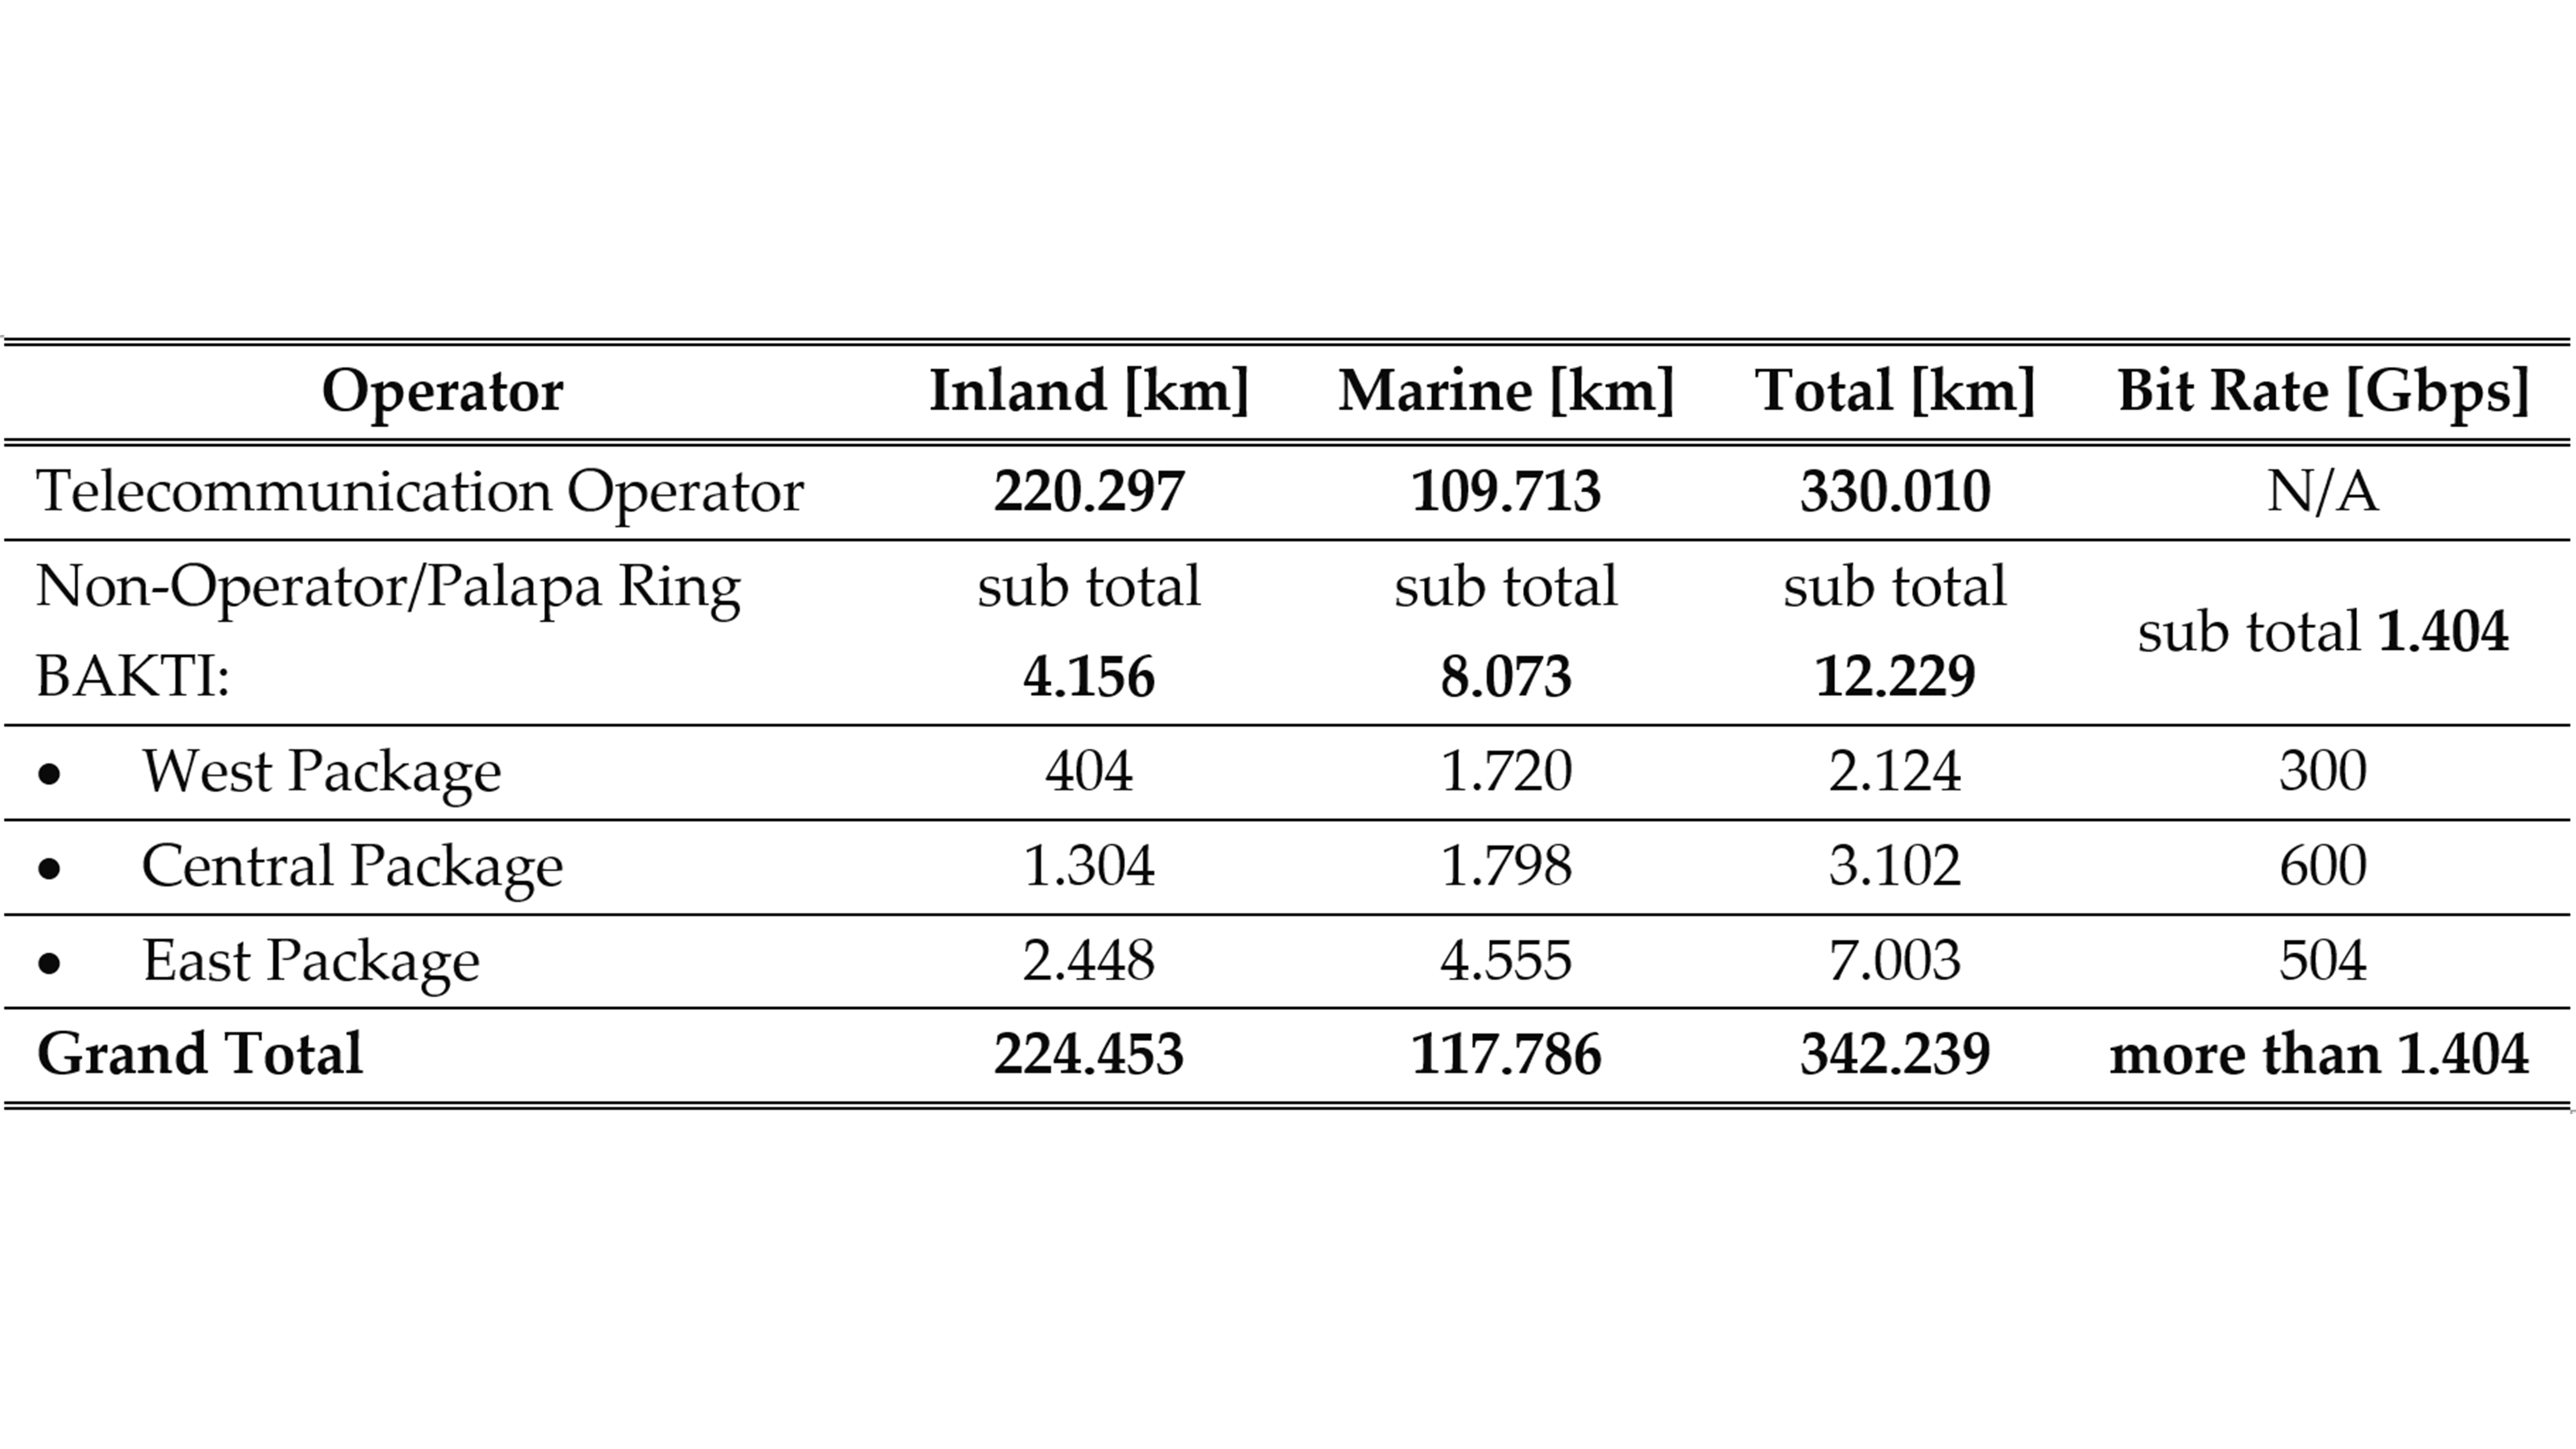

Supplement: s1 [file s1 › Table S1.tif]

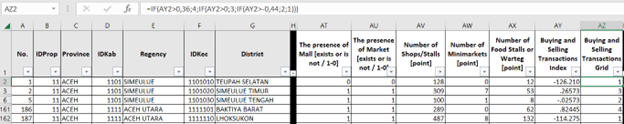

Supplement: s1 [file s1 › Table S10 (Transaction).tif]

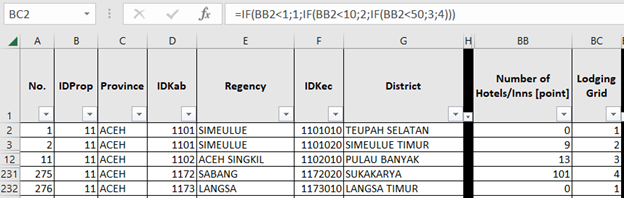

Supplement: s1 [file s1 › Table S11(Lodging).tif]

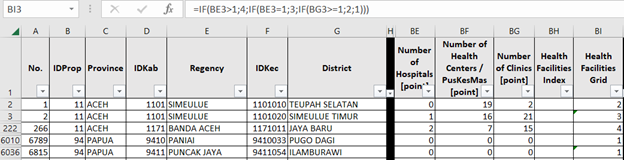

Supplement: s1 [file s1 › Table S12 (Health).tif]

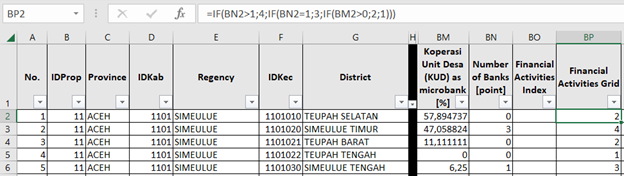

Supplement: s1 [file s1 › Table S13 (Financial Activities).tif]

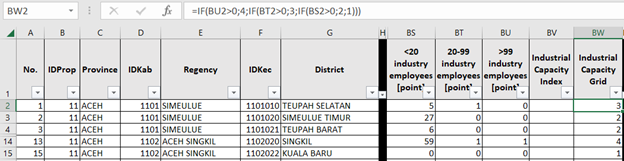

Supplement: s1 [file s1 › Table S14 (Industrial Capacity).tif]

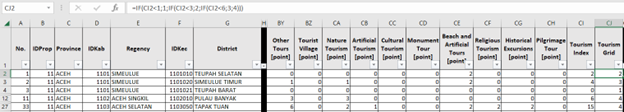

Supplement: s1 [file s1 › Table S15 (Tourism).tif]

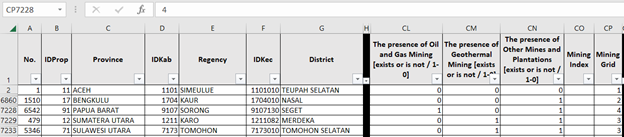

Supplement: s1 [file s1 › Table S16 (Mining).tif]

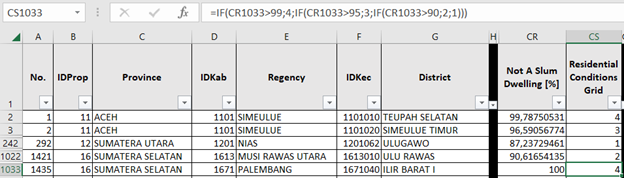

Supplement: s1 [file s1 › Table S17 (Residential Conditions).tif]

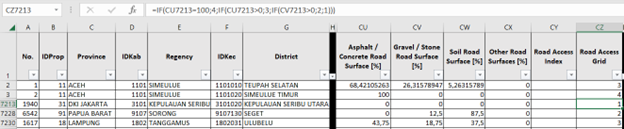

Supplement: s1 [file s1 › Table S18 (Road Access).tif]

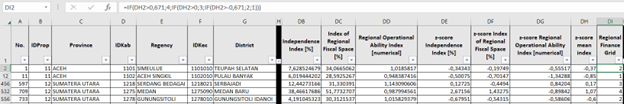

Supplement: s1 [file s1 › Table S19 (Regional Finance).tif]

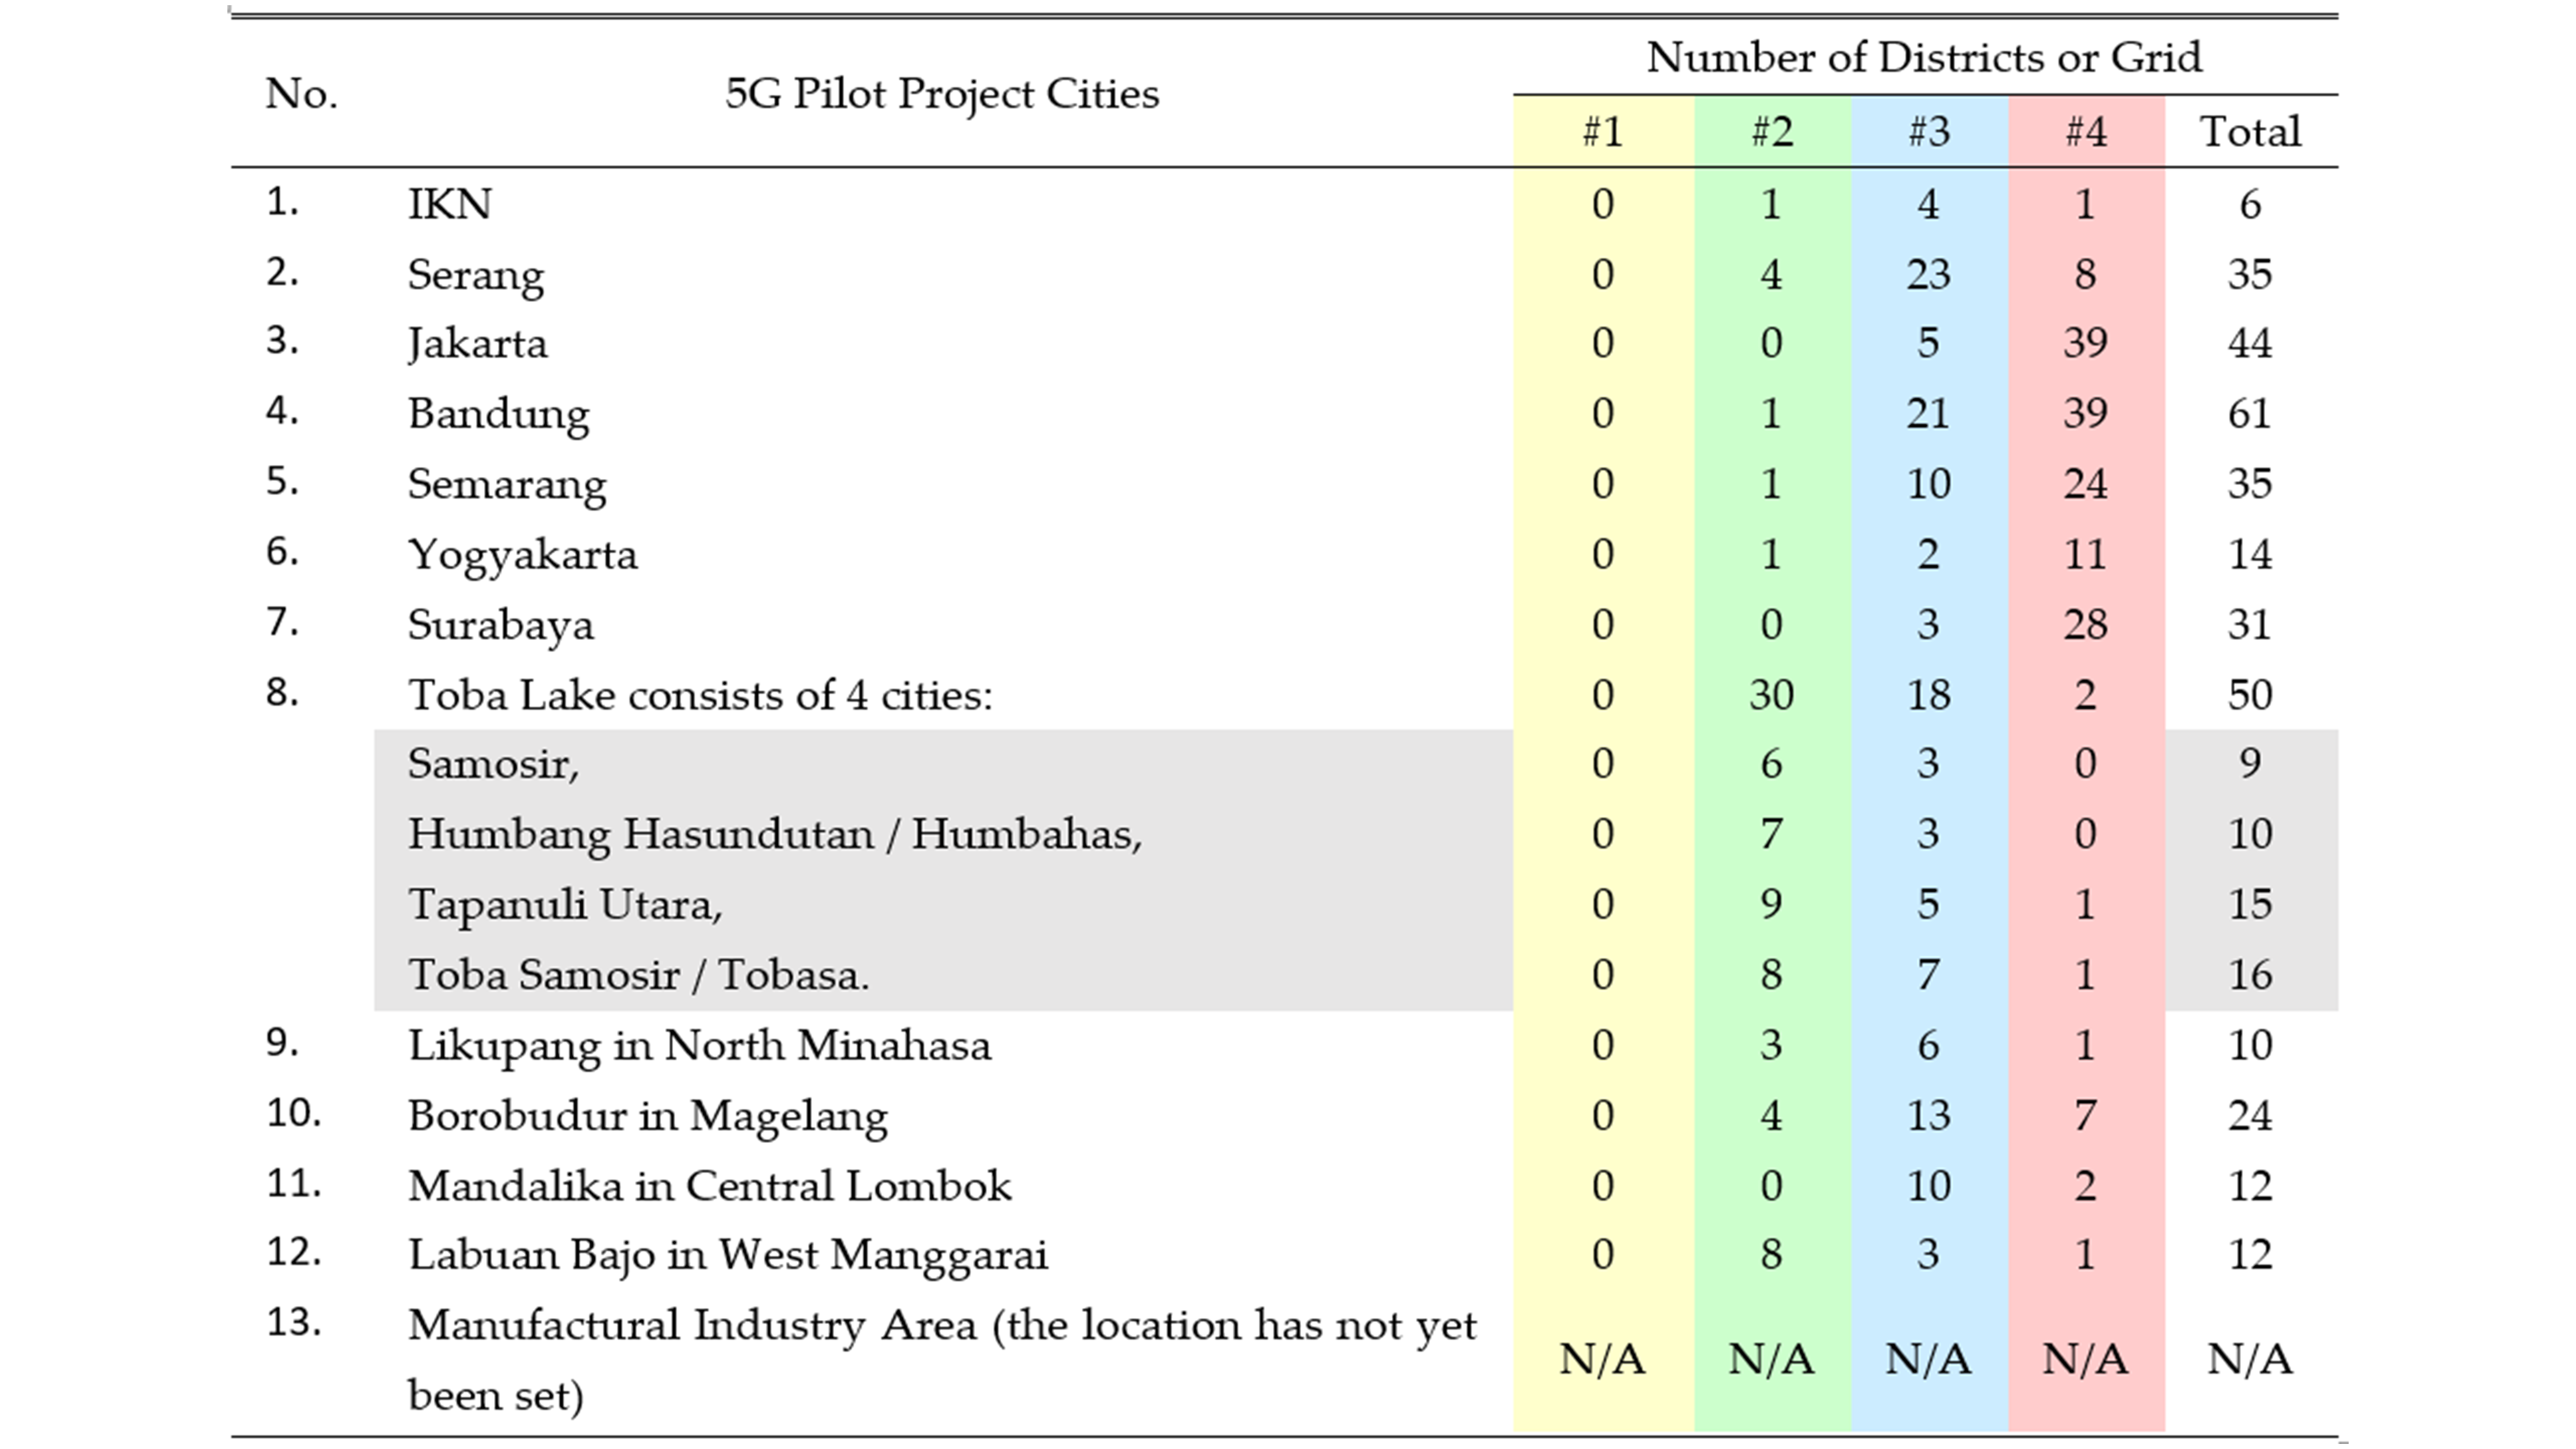

Supplement: s1 [file s1 › Table S2.tif]

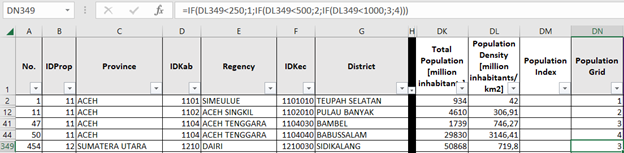

Supplement: s1 [file s1 › Table S20 (Population).tif]

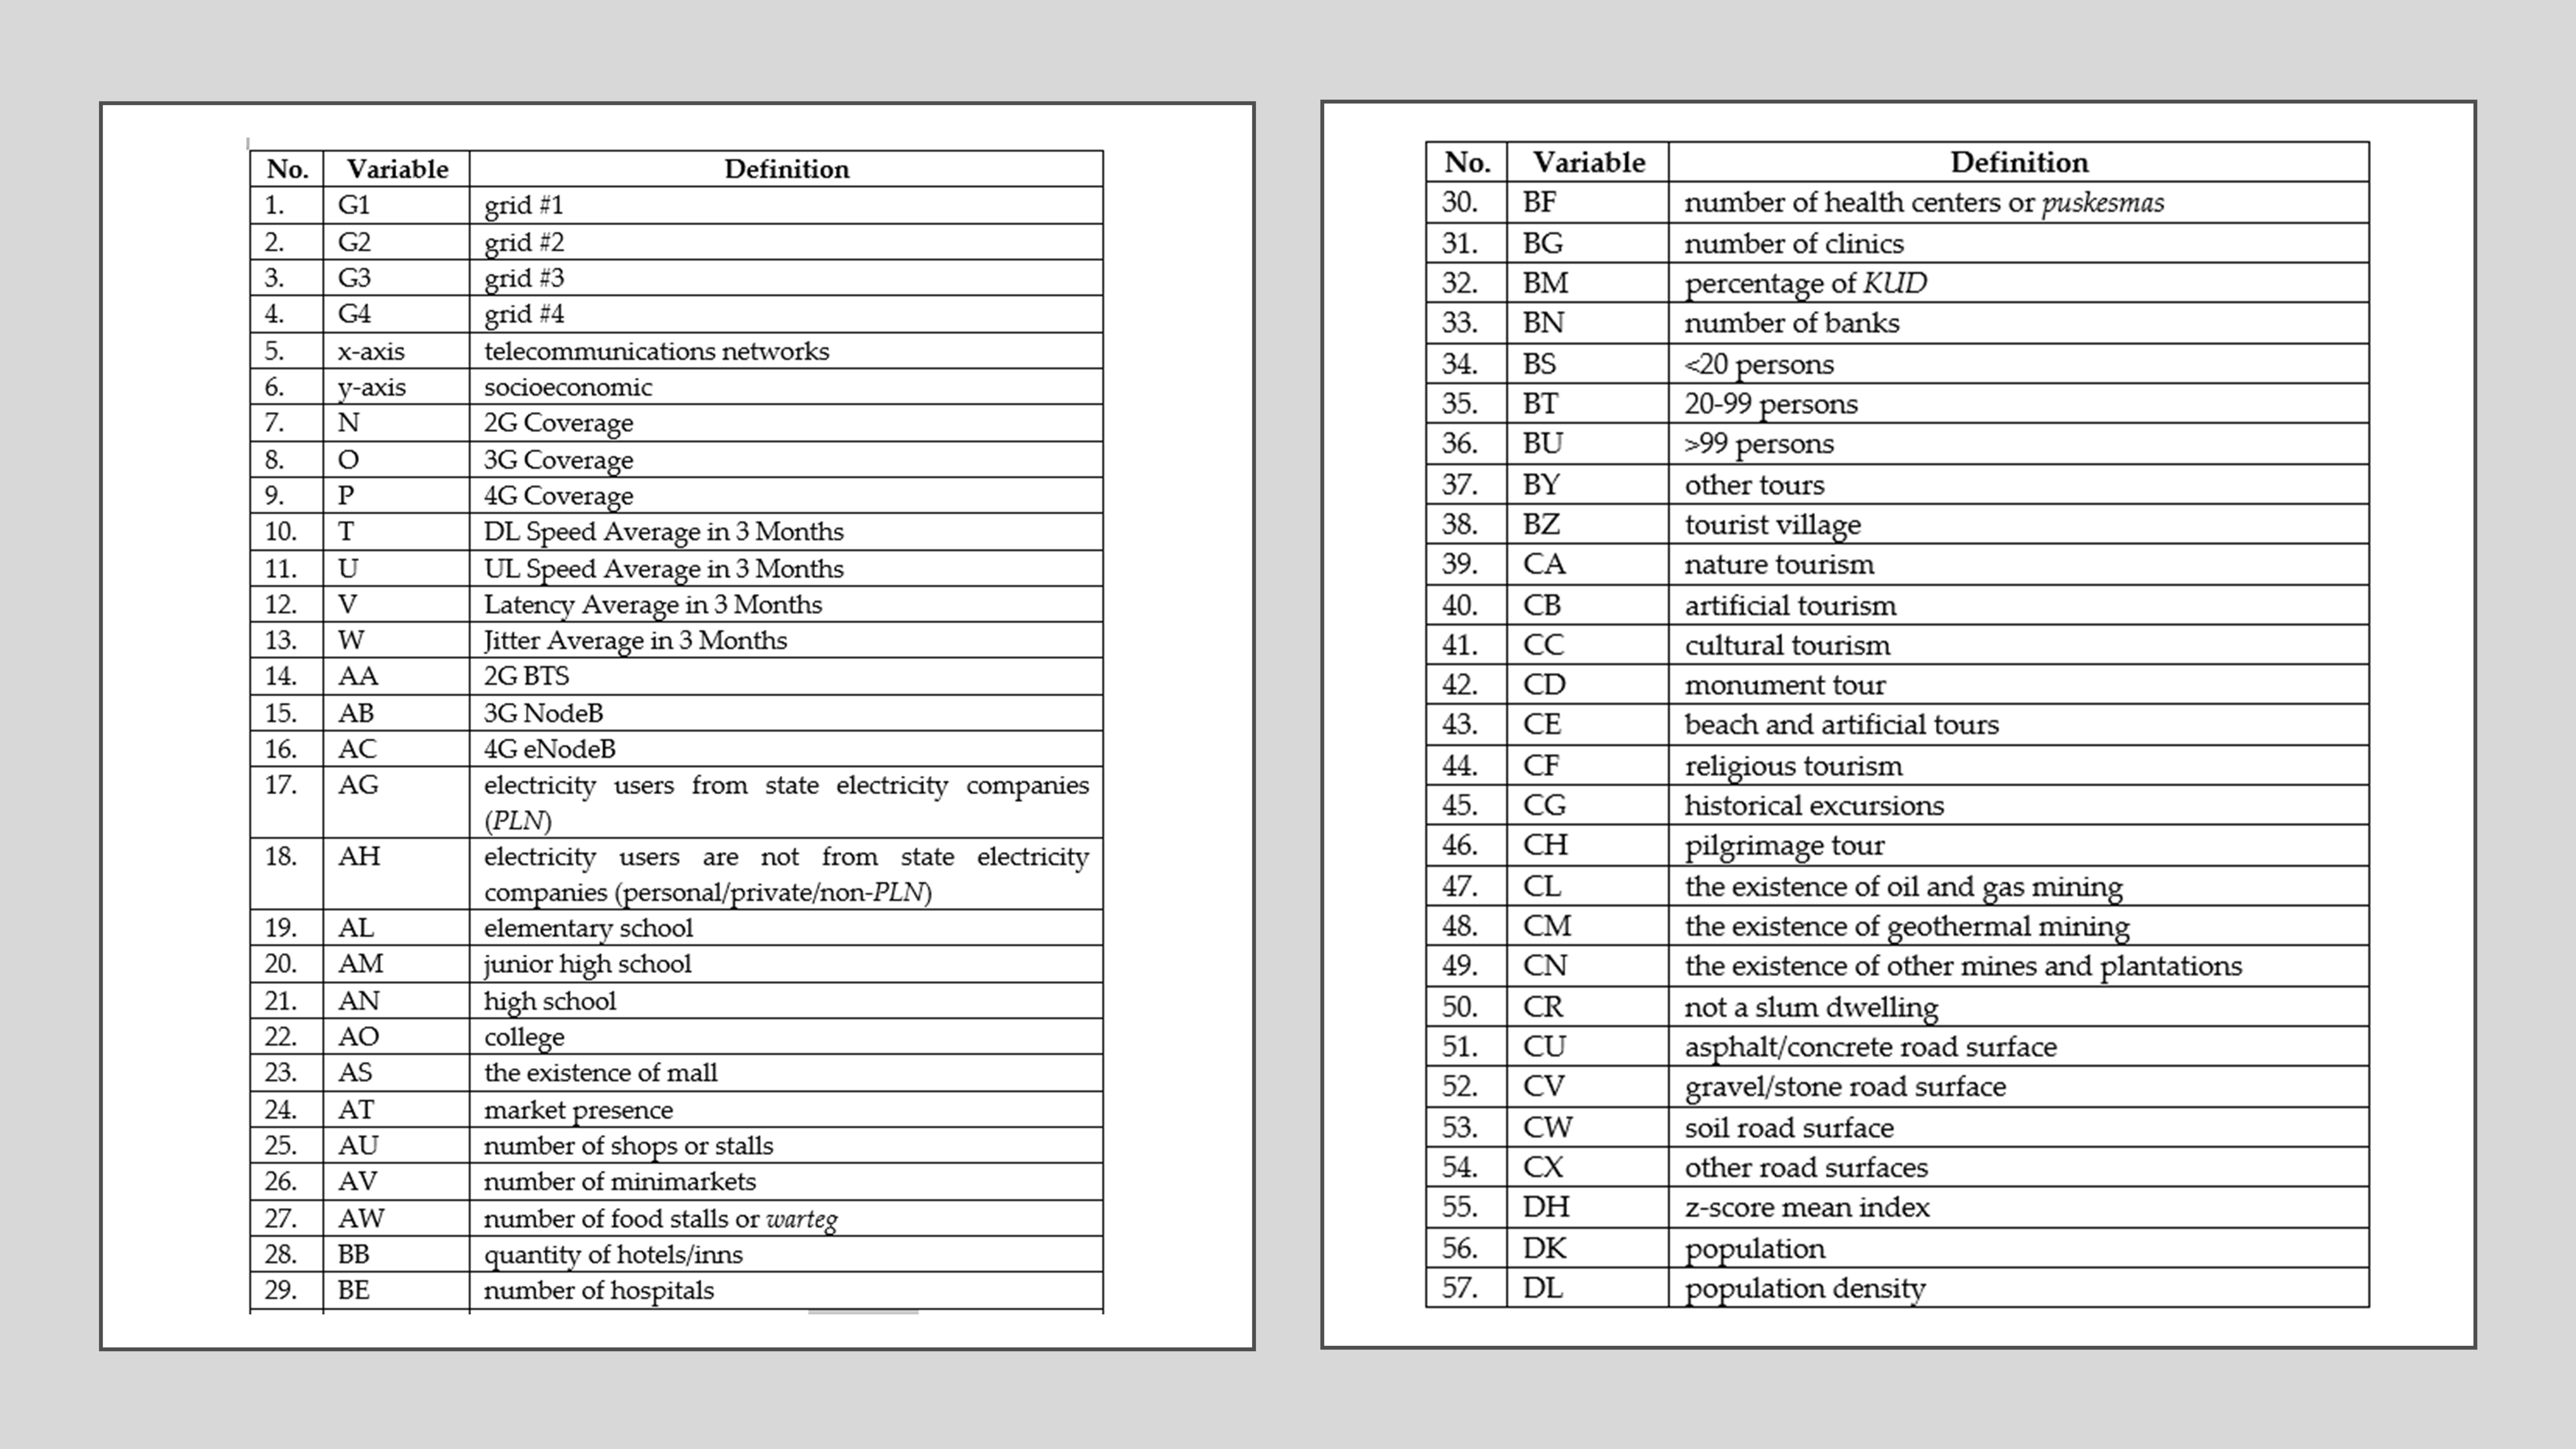

Supplement: s1 [file s1 › Table S3.tif]

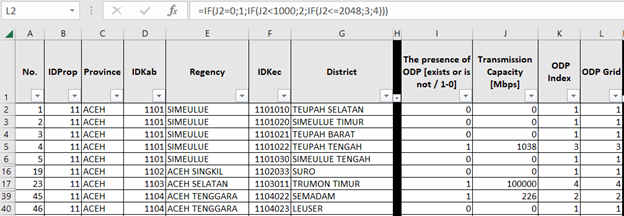

Supplement: s1 [file s1 › Table S4 (ODP).tif]

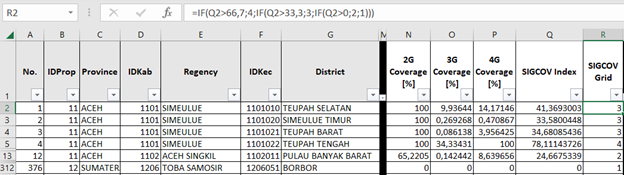

Supplement: s1 [file s1 › Table S5 (SigCov).tif]

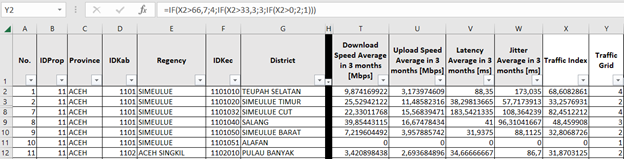

Supplement: s1 [file s1 › Table S6 (Traffic).tif]

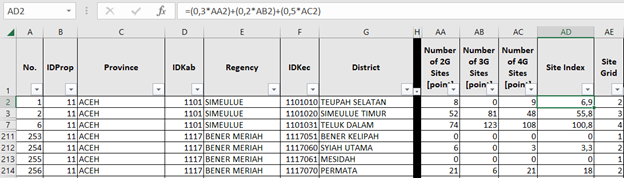

Supplement: s1 [file s1 › Table S7 (Sites).tif]

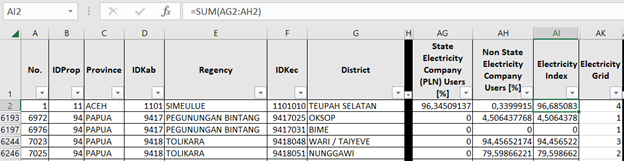

Supplement: s1 [file s1 › Table S8 (Electricity).tif]

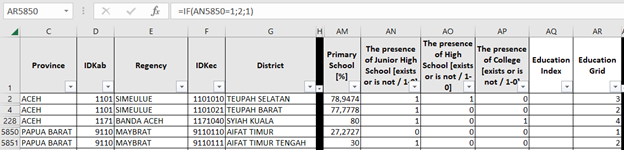

Supplement: s1 [file s1 › Table S9 (Education).tif]
